# Supplementary material for: Tautomerism and bioactivities of curcumenol, a common sesquiterpenoid widely existing in edible plants
Source: Royal Society of Chemistry journal article supplement (doi:10.1039/c8fo02549e), 2019-01-01
Supplement: c8fo02549e1.pdf [file c8fo02549e1.pdf]

## Electronic Supplementary Information

*for*

### Tautomerism and Bioactivities of Curcumenol, A Common Sesquiterpenoid Widely Existing in Edible Plants

Li-Sha Zhang,<sup>a</sup> Sheng-Nan Shen,<sup>c</sup> Yu-Li Gao,<sup>a,d</sup> Shui-Yang Shi,<sup>a</sup> Chang-Xin Zhou,<sup>a</sup> Jian-Xia Mo,<sup>a</sup>

You-Kai Xu,<sup>b</sup> Li-Gen Lin,<sup>\*c</sup> and Li-She Gan <sup>\*a,d</sup>

<sup>a</sup> *College of Pharmaceutical Sciences, Zhejiang University, 866 Yuhangtang Road, Hangzhou  
310058, People's Republic of China.*

<sup>b</sup> *Xishuangbanna Tropical Botanical Garden, Chinese Academy of Sciences, Menglun 666303,  
People's Republic of China.*

<sup>c</sup> *State Key Laboratory of Quality Research in Chinese Medicine, Institute of Chinese Medical  
Sciences, University of Macau, Macao 999078, People's Republic of China.*

<sup>d</sup> *Hangzhou Institute of Innovative Medicine, Zhejiang University, 291 Fucheng Road, Hangzhou  
310018, People's Republic of China.*

## Section I. Spectroscopic Data

- S1.  $^1\text{H}$  NMR spectrum of **curcumenol** at 500 MHz in methanol- $d_4$  (298.15 K).
- S2.  $^{13}\text{C}$  NMR spectrum of **curcumenol** at 125 MHz in methanol- $d_4$ .
- S3. HMBC spectrum of **curcumenol** at 500 MHz in methanol- $d_4$ .
- S4. HMQC spectrum of **curcumenol** at 500 MHz in methanol- $d_4$ .
- S5. NOESY spectrum of **curcumenol** at 500 MHz in methanol- $d_4$ .
- S6.  $^1\text{H}$  NMR spectrum of **curcumenol** at 500 MHz in DMSO- $d_6$  (298.15 K)
- S7.  $^{13}\text{C}$  NMR spectrum of **curcumenol** at 125 MHz in DMSO- $d_6$ .
- S8. HMBC spectrum of **curcumenol** at 500 MHz in DMSO- $d_6$
- S9. HMQC spectrum of **curcumenol** at 500 MHz in DMSO- $d_6$
- S10. NOESY spectrum of **curcumenol** at 500 MHz in DMSO- $d_6$
- S11. IR spectrum of **curcumenol** (KBr disc).
- S12.  $^1\text{H}$  NMR spectrum of **curcumenol** at 500 MHz in methanol- $d_4$  (313.15 K).
- S13.  $^1\text{H}$  NMR spectrum of **curcumenol** at 500 MHz in methanol- $d_4$  (333.15 K).
- S14.  $^1\text{H}$  NMR spectrum of **curcumenol** at 500 MHz in acetone- $d_6$  (298.15 K).
- S15.  $^{13}\text{C}$  NMR spectrum of **curcumenol** at 125 MHz in acetone- $d_6$ .
- S16.  $^1\text{H}$  NMR spectrum of **curcumenol** at 500 MHz in  $\text{CDCl}_3$ .
- S17.  $^{13}\text{C}$  NMR spectrum of **curcumenol** at 125 MHz in  $\text{CDCl}_3$ .
- S18.  $^1\text{H}$  NMR spectrum of **curcumenol** at 500 MHz in benzene- $d_6$  (298.15 K).
- S19.  $^1\text{H}$  NMR spectrum of **curcumenol** at 500 MHz in 1,4-dioxane- $d_8$  (298.15 K).
- S20.  $^1\text{H}$  NMR spectrum of **curcumenol** at 500 MHz in THF- $d_8$  (298.15 K).
- S21.  $^1\text{H}$  NMR spectrum of **curcumenol** at 500 MHz in acetonitrile- $d_3$  (298.15 K).
- S22.  $^1\text{H}$  NMR spectrum of **curcumenol** at 500 MHz in pyridine- $d_5$  (298.15 K).
- S23.  $^1\text{H}$  NMR spectrum of acetylcurcumenol (**1a**) at 500 MHz in methanol- $d_4$
- S24.  $^{13}\text{C}$  NMR spectrum of acetylcurcumenol (**1a**) at 125 MHz in methanol- $d_4$
- S25. HMBC spectrum of acetylcurcumenol (**1a**) at 125 MHz in methanol- $d_4$
- S26. HMQC spectrum of acetylcurcumenol (**1a**) at 125 MHz in methanol- $d_4$
- S27. NOESY spectrum of acetylcurcumenol (**1a**) at 500 MHz in methanol- $d_4$
- S28.  $^1\text{H}$  NMR spectrum of byproducts of acetylation at 500 MHz in methanol- $d_4$
- S29.  $^{13}\text{C}$  NMR spectrum of byproducts of acetylation at 500 MHz in methanol- $d_4$
- S30.  $^1\text{H}$  NMR spectrum of methylcurcumenol (**1b**) at 500 MHz in methanol- $d_4$
- S31.  $^{13}\text{C}$  NMR spectrum of methylcurcumenol (**1b**) at 500 MHz in methanol- $d_4$
- S32.  $^1\text{H}$  NMR spectrum of byproducts of methylation at 500 MHz in methanol- $d_4$

- S33.  $^1\text{H}$  NMR spectrum of byproducts of methylation at 500 MHz in methanol- $d_4$
- S34.  $^1\text{H}$  NMR spectrum of 12-hydroxycurcumenol at 500 MHz in acetone- $d_6$ .
- S35.  $^{13}\text{C}$  NMR spectrum of 12-hydroxycurcumenol at 125 MHz in acetone- $d_6$ .

## Section II. Experimental

- S36. Table  $^1\text{H}$ - (500 MHz) and  $^{13}\text{C}$ -NMR (125 MHz) data of curcumenol (**1**) and curcumenotone (**2**) in  $\text{CD}_3\text{OD}$ .
- S37. HR-LC-MS analysis
- S38. HR-LC-MS analysis of the resulted acetylation mixture.
- S39. HR-LC-MS analysis of the resulting methylation mixture.
- S40. Solvents parameters table.
- S41. MTT assay and CCK8 cytotoxicity assay.
- S42. DPPH free radical-scavenging assay.

## Section III. Quantum Chemical Calculations

- S43. Lowest energy conformers of curcumenol (**1**) and curcumenotone (**2**).
- S44. Calculation and calculated ECD data.
- S45. Energy profile of reaction path calculation.

**S1.  $^1\text{H}$  NMR spectrum of curcumenol at 500 MHz in methanol- $d_4$  (298.15 K).**

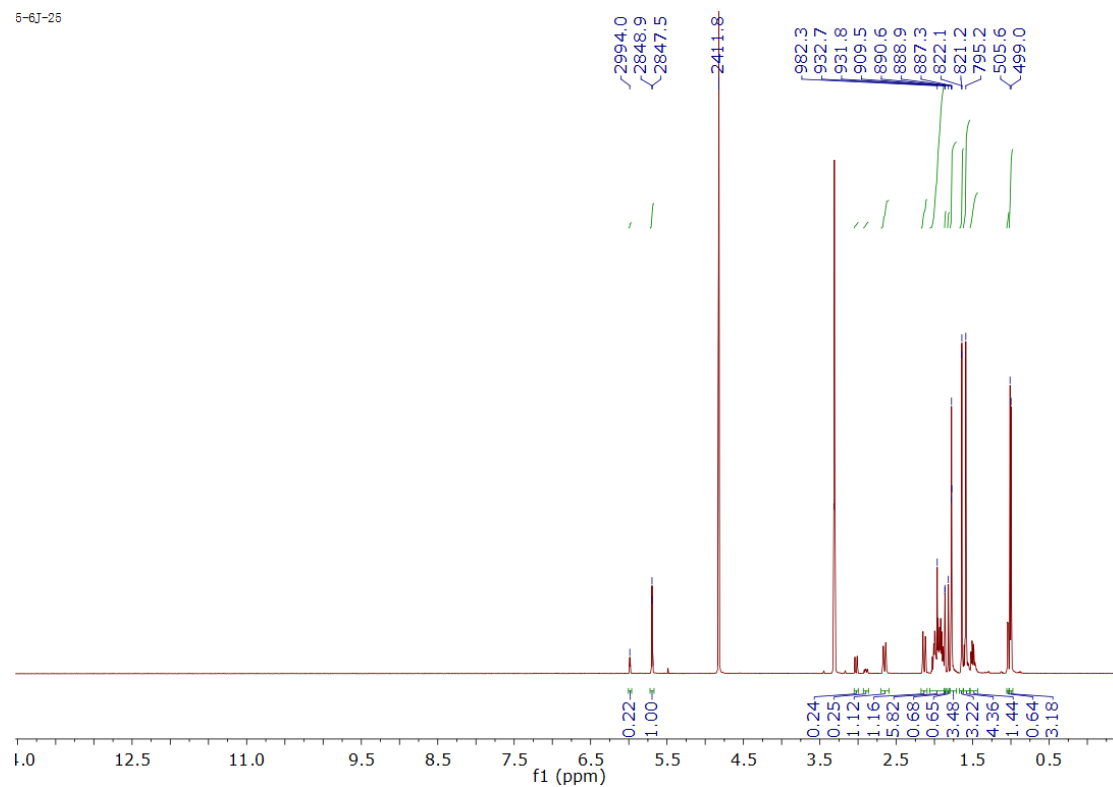

**S2.  $^{13}\text{C}$  NMR spectrum of curcumenol at 125 MHz in methanol- $d_4$ .**

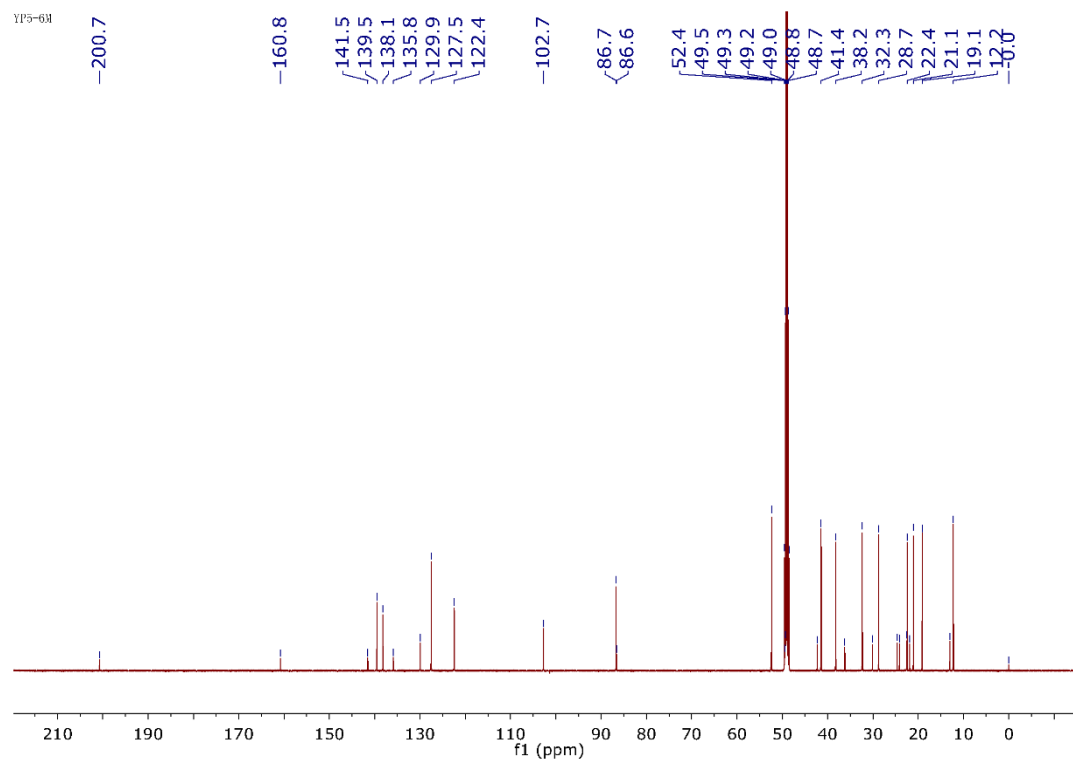

**S3. HMBC spectrum of curcumenol at 500 MHz in methanol-*d*<sub>4</sub>.**

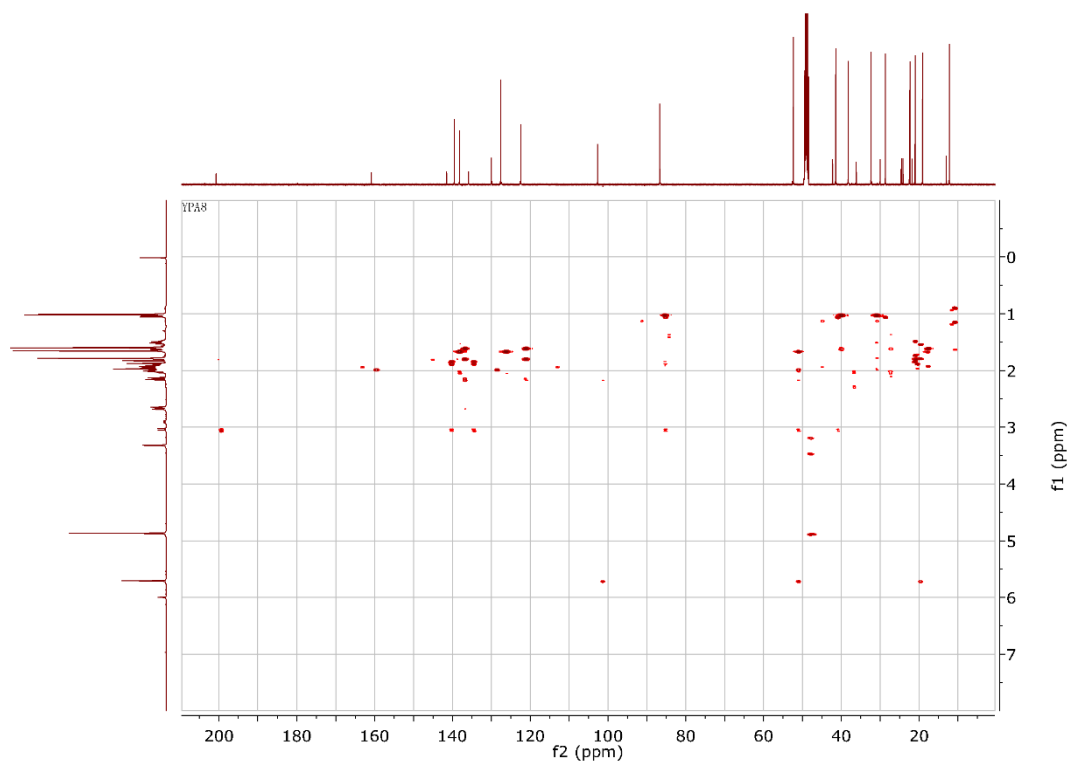

**S4. HMQC spectrum of 1 at 500 MHz in methanol-*d*<sub>4</sub>.**

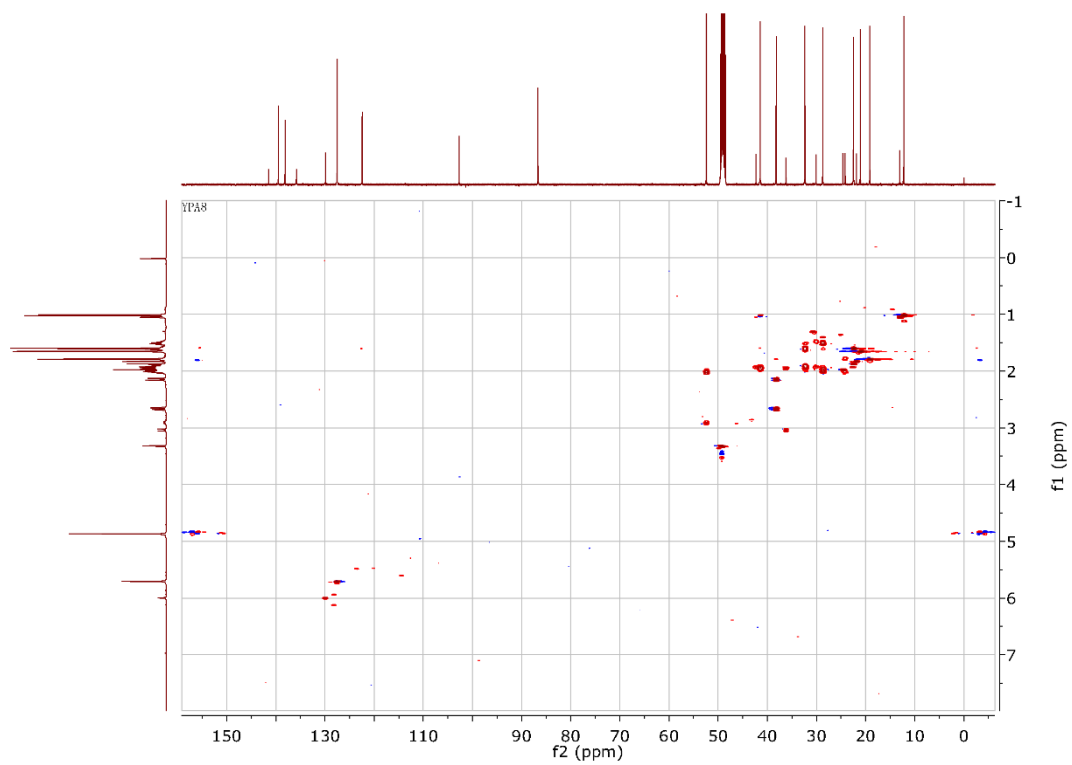

**S5. NOESY spectrum of curcumenol at 500 MHz in methanol- $d_4$ .**

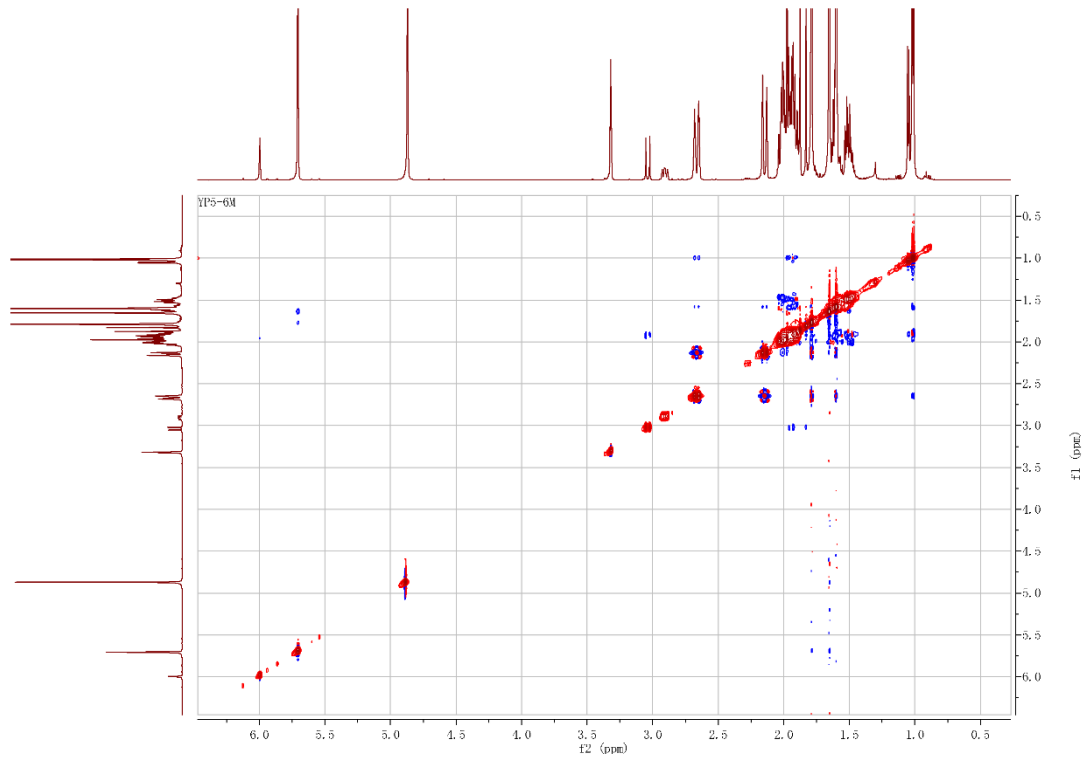

**S6.  $^1\text{H}$  NMR spectrum of curcumenol at 500 MHz in DMSO- $d_6$  (298.15 K)**

5-6S-25

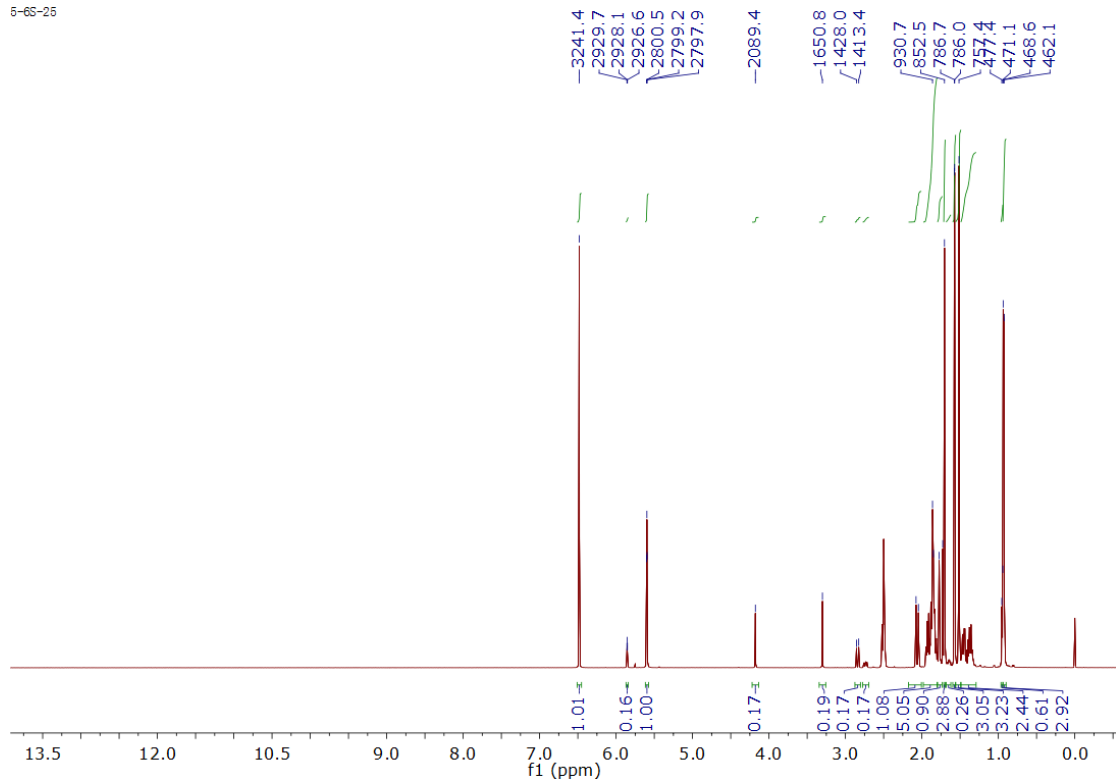

S7.  $^{13}\text{C}$  NMR spectrum of curcumenol at 125 MHz in  $\text{DMSO-}d_6$ .

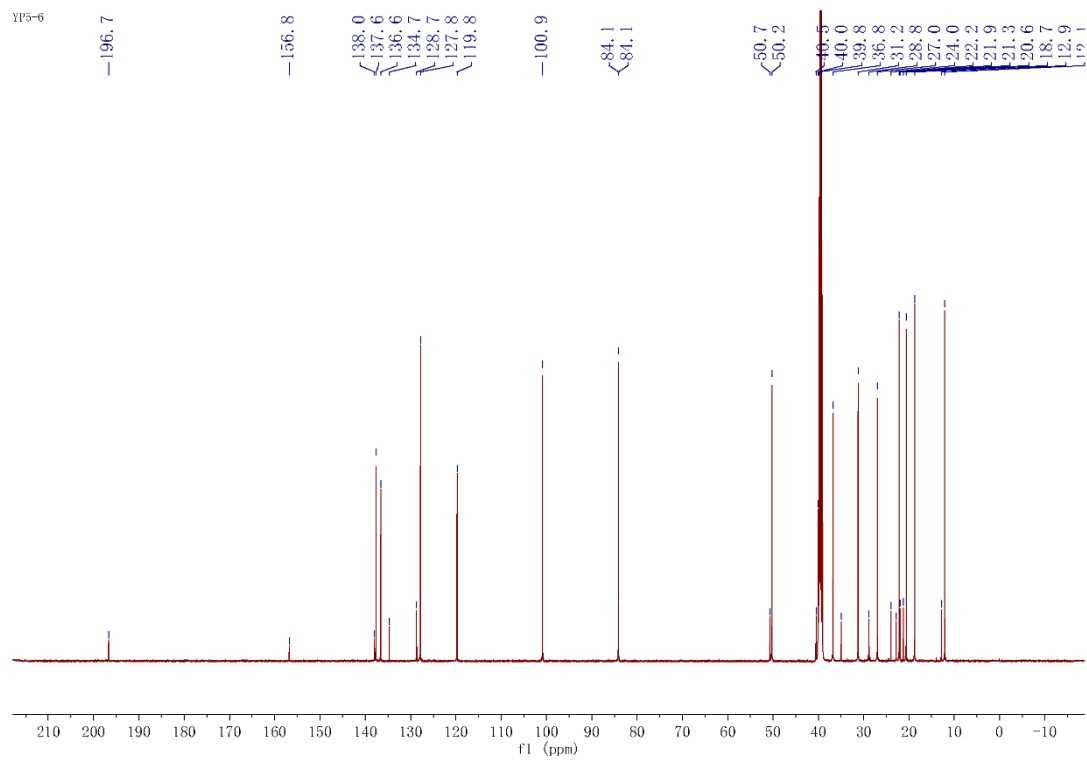

S8. HMBC spectrum of curcumenol at 500 MHz in  $\text{DMSO-}d_6$

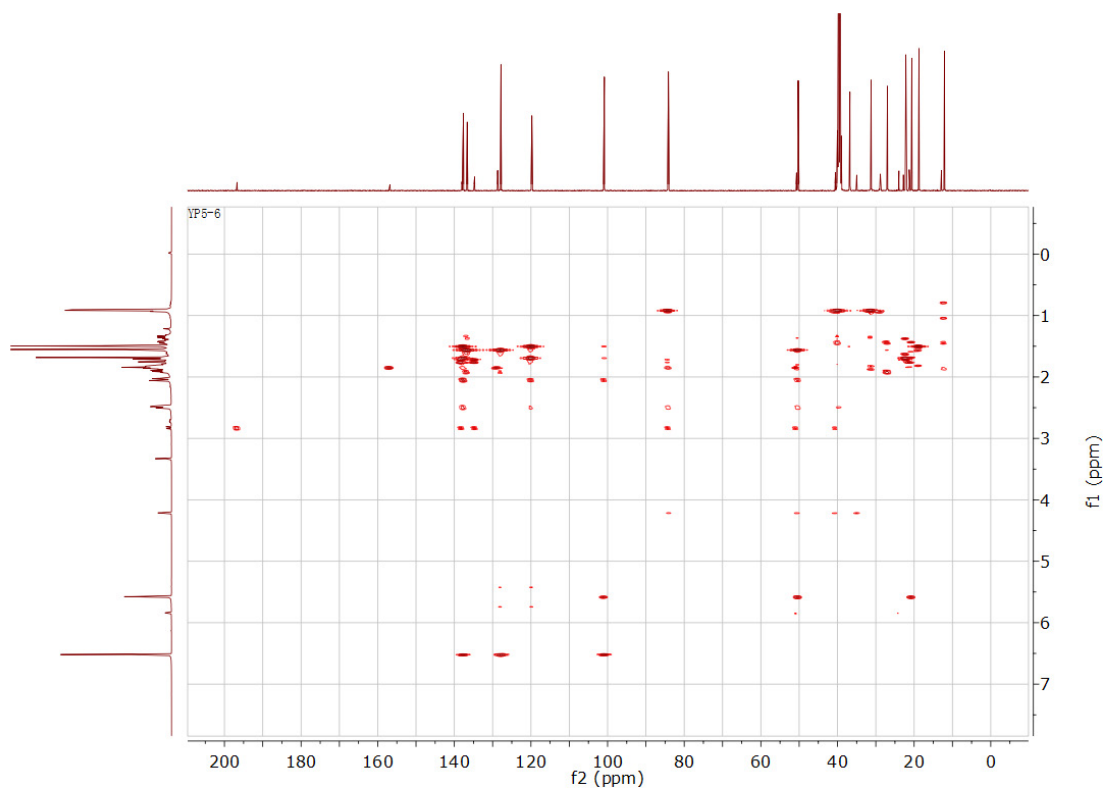

**S9. HMQC spectrum of curcumenol at 500 MHz in DMSO- $d_6$**

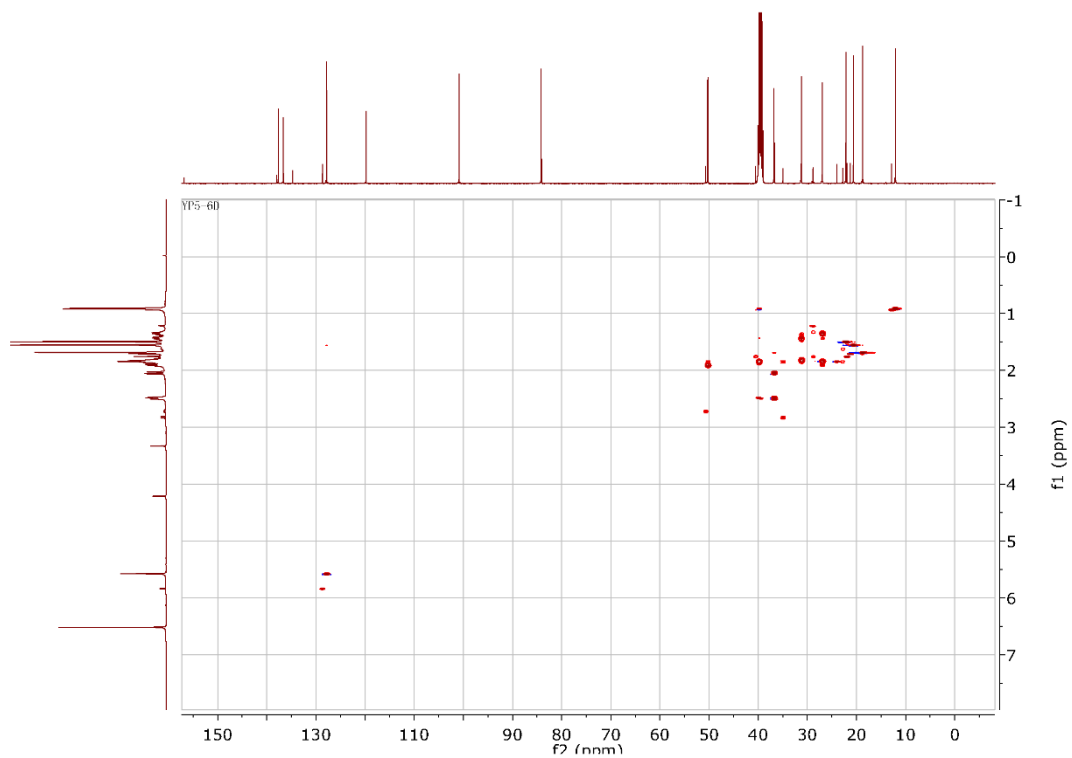

**S10. NOESY spectrum of curcumenol at 500 MHz in DMSO- $d_6$**

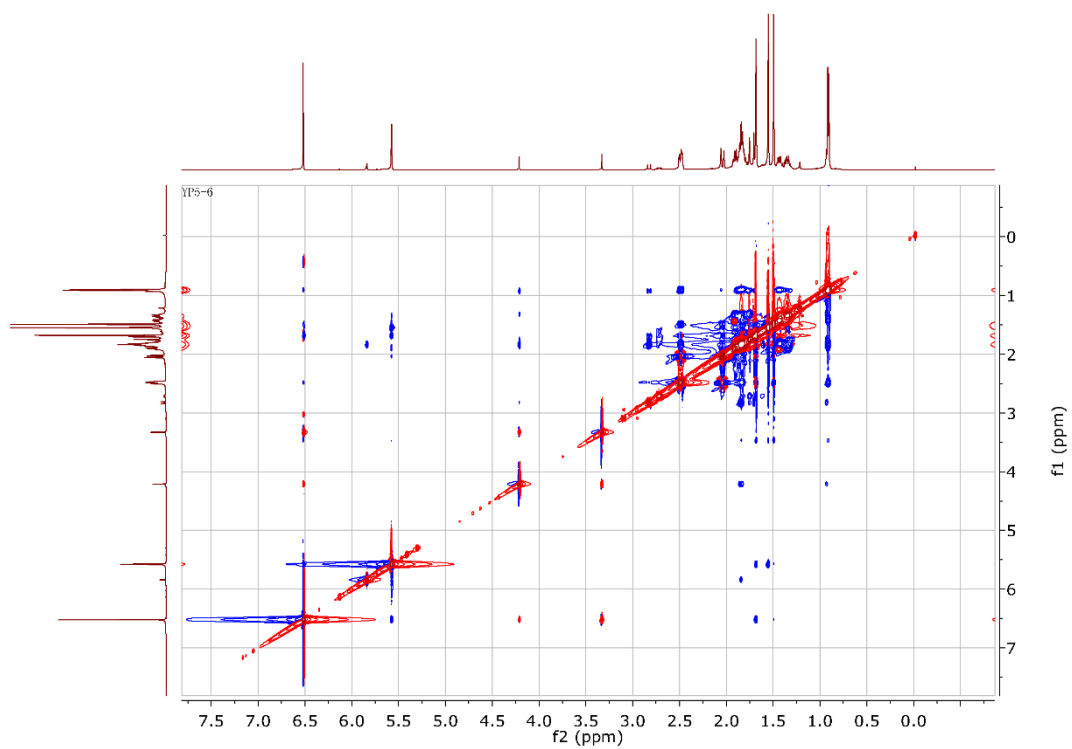



### S11. IR spectrum of curcumenol (KBr disc)

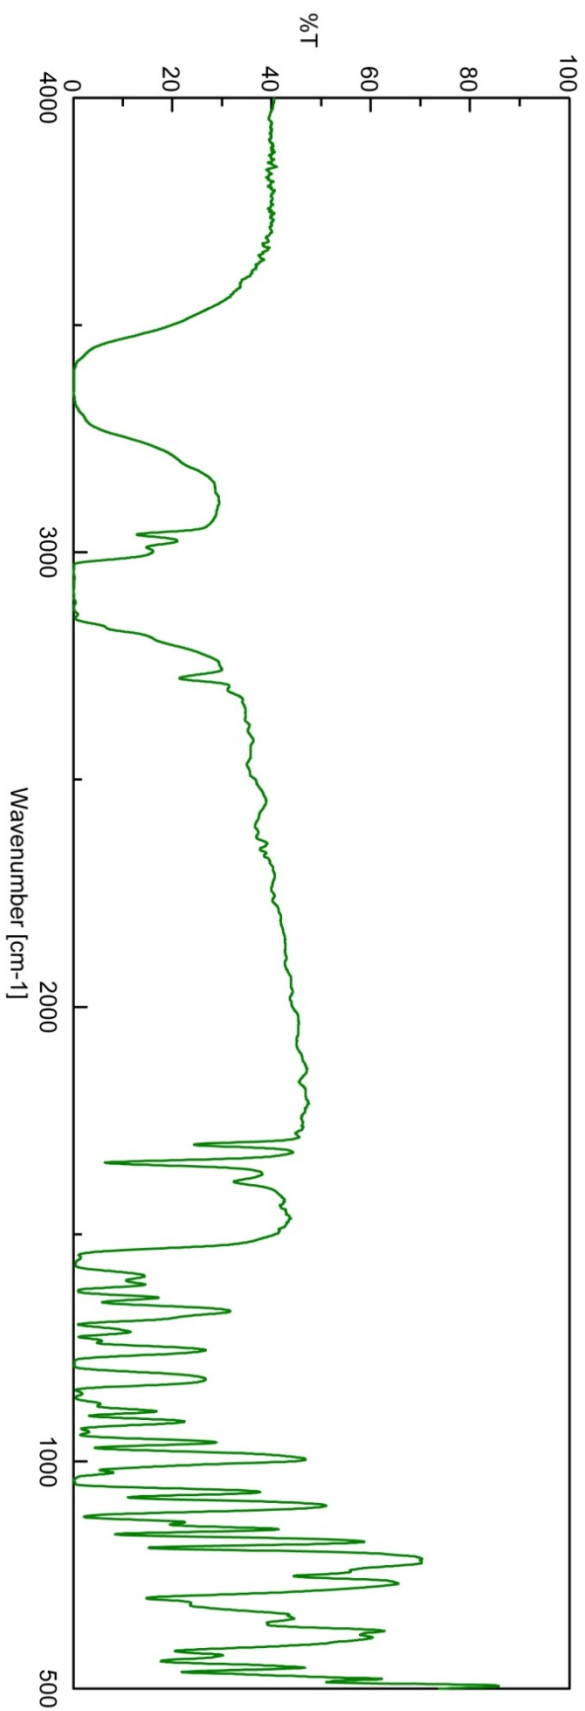

|                    |                   |                           |                 |
|--------------------|-------------------|---------------------------|-----------------|
| [Comment]          |                   | [Measurement Information] |                 |
| Sample Name        |                   | Model Name                | FT/IR-4100typeA |
| Comment            |                   | Serial Number             | B071161016      |
| User               |                   | Light Source              | Standard        |
| Division           | 浙江大学              | Detector                  | TGS             |
| Company            |                   | Accumulation              | 16              |
|                    |                   | Resolution                | 2 cm-1          |
|                    |                   | Zero Filling              | On              |
| [Data Information] |                   | Apodization               | Cosine          |
| Creation Date      | 2016/1/7 15:10    | Gain                      | Auto (32)       |
| Data array type    | Linear data array | Aperture                  | Auto (5 mm)     |
| Horizontal         | Wavenumber [cm-1] | Scanning Speed            | Auto (2 mm/sec) |
| Vertical           | %T                | Filter                    | Auto (30000 Hz) |
| Start              | 499.955 cm-1      |                           |                 |
| End                | 4000.12 cm-1      |                           |                 |
| Data pitch         | 0.482117 cm-1     |                           |                 |
| Data points        | 7261              |                           |                 |

5-6.jws

S12.  $^1\text{H}$  NMR spectrum of curcumenol at 500 MHz in methanol- $d_4$  (313.15 K).

YPA1

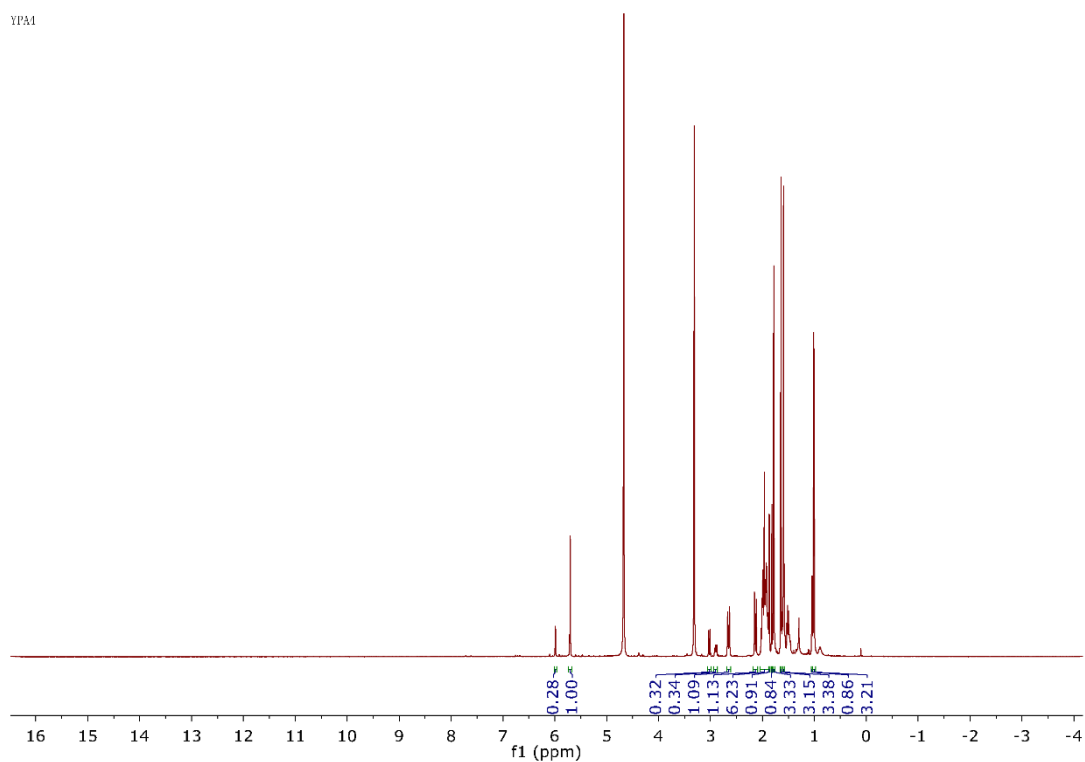

S13.  $^1\text{H}$  NMR spectrum of curcumenol at 500 MHz in methanol- $d_4$  (333.15 K).

YPA1  
333K

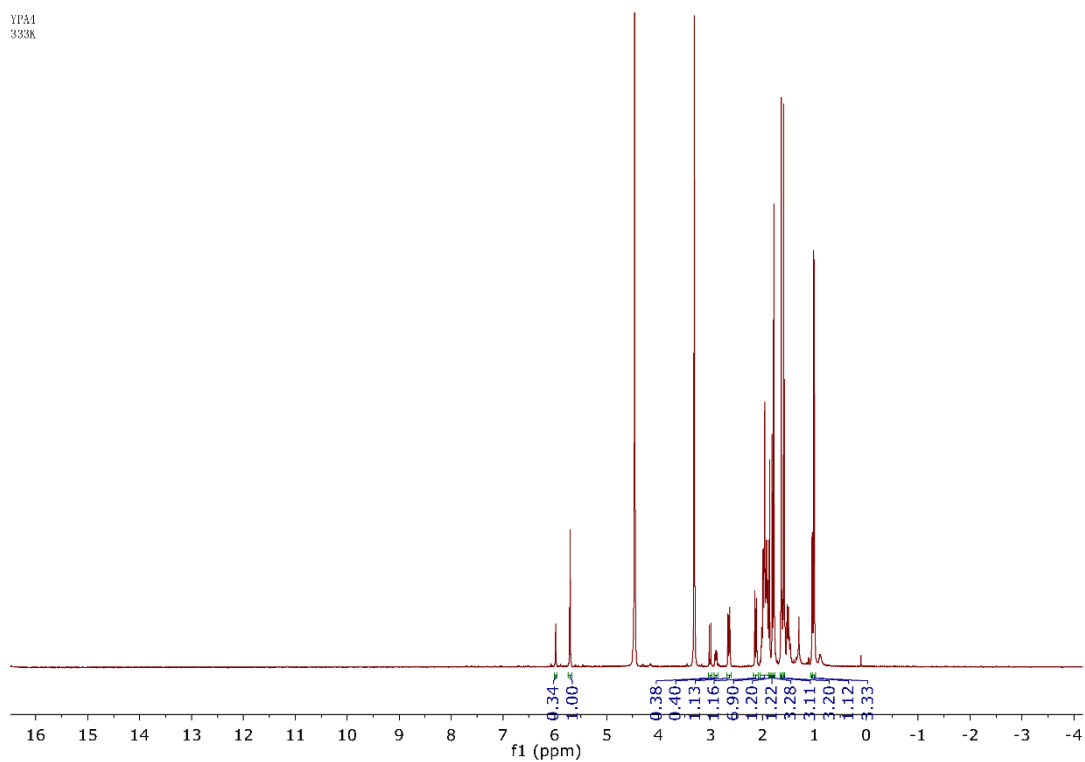

S14.  $^1\text{H}$  NMR spectrum of curcumenol at 500 MHz in acetone- $d_6$  (298.15 K).

5-6A-25

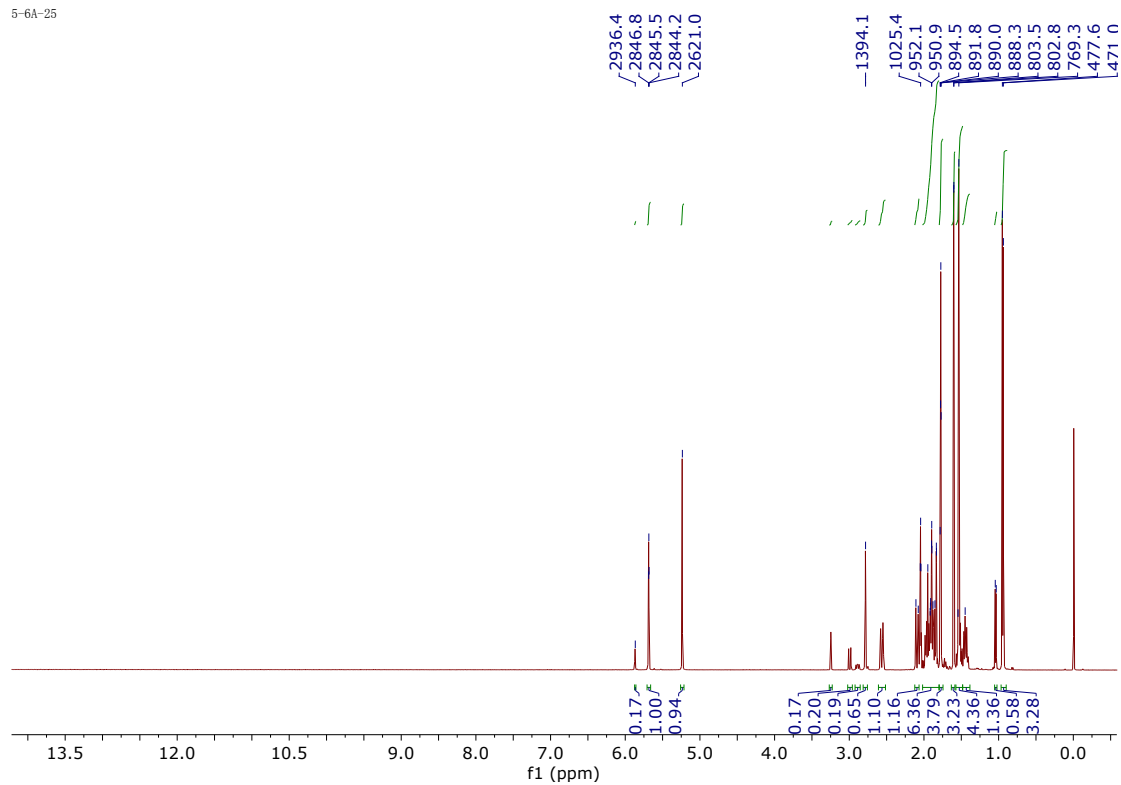

S15.  $^{13}\text{C}$  NMR spectrum of curcumenol at 125 MHz in acetone- $d_6$ .

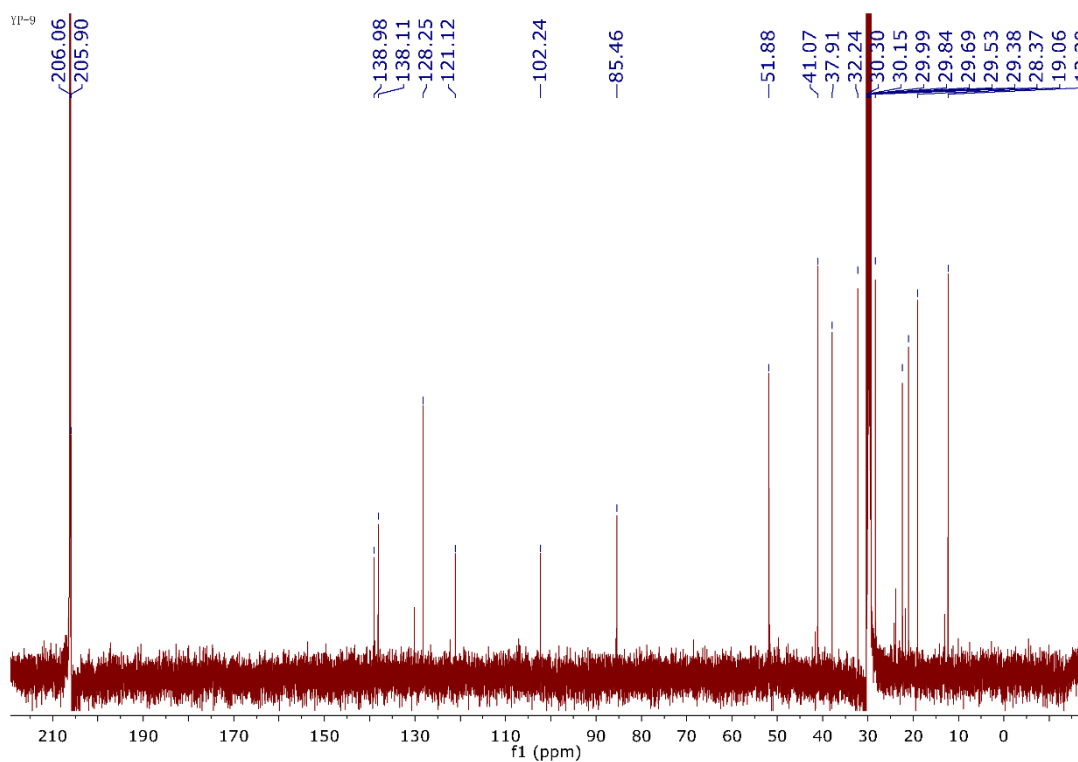

S16.  $^1\text{H}$  NMR spectrum of curcumenol at 500 MHz in  $\text{CDCl}_3$ .

YP5-6

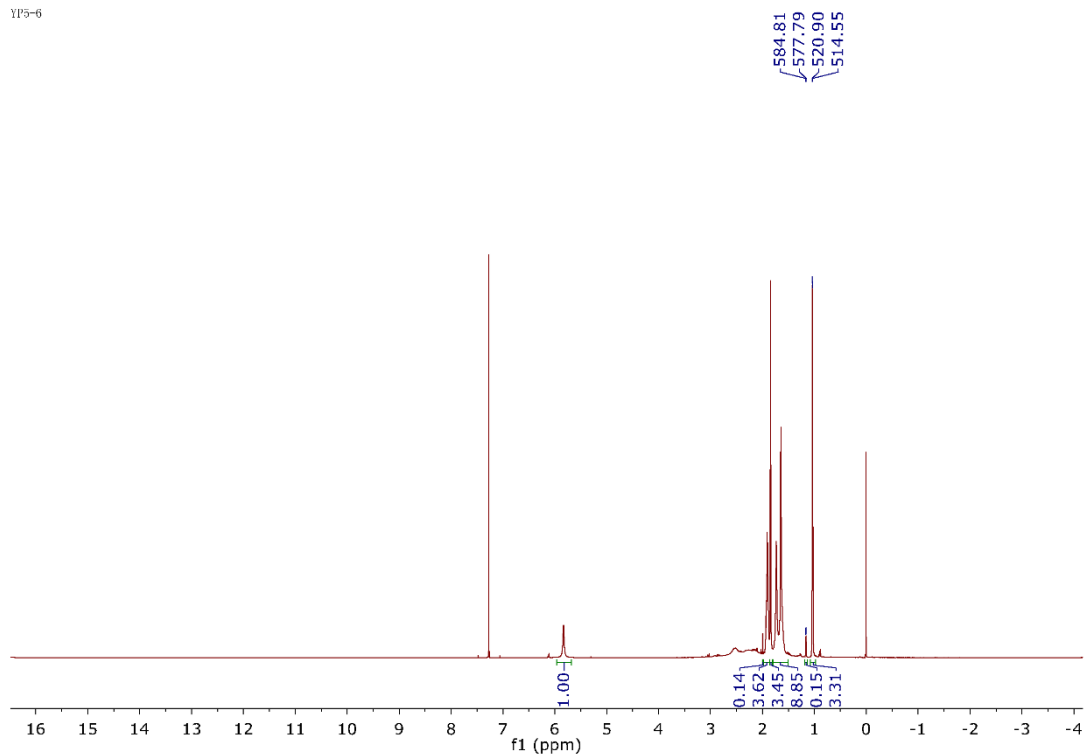

S17.  $^{13}\text{C}$  NMR spectrum of curcumenol at 125 MHz in  $\text{CDCl}_3$ .

YP5-6

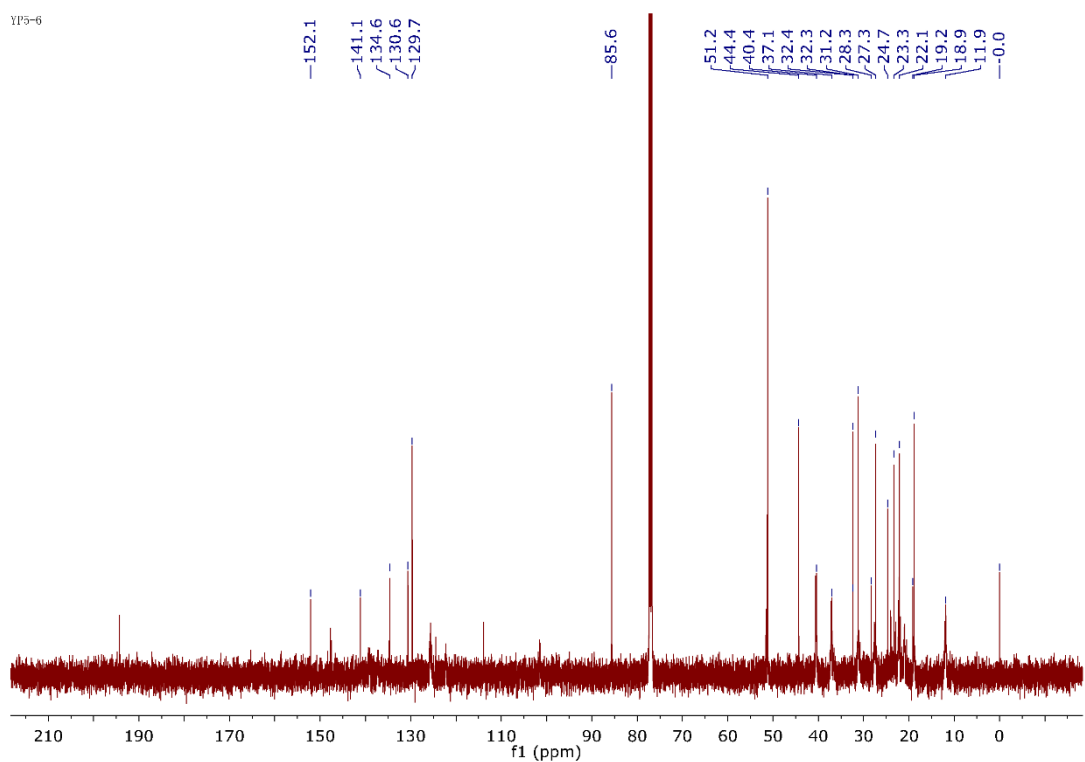

S18.  $^1\text{H}$  NMR spectrum of curcumenol at 500 MHz in benzene- $d_6$  (298.15 K).

6-66-25

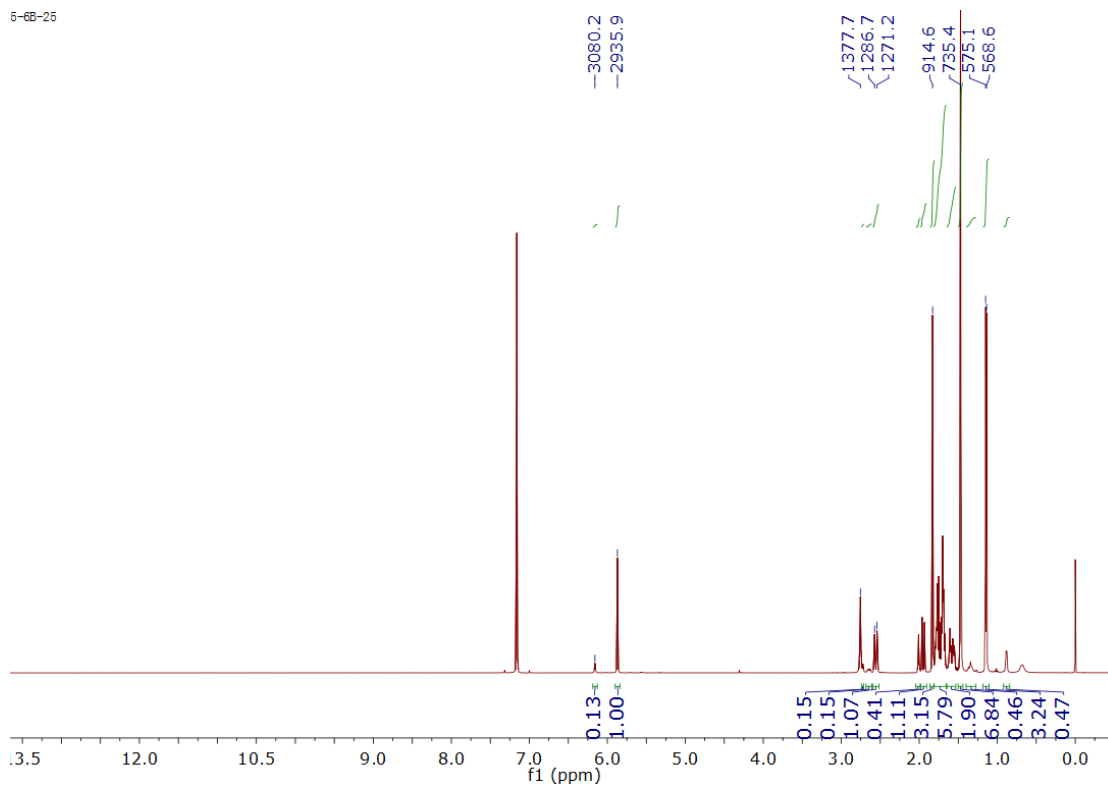

S19.  $^1\text{H}$  NMR spectrum of curcumenol at 500 MHz in 1,4-dioxane- $d_8$  (298.15 K).

6-6L-25

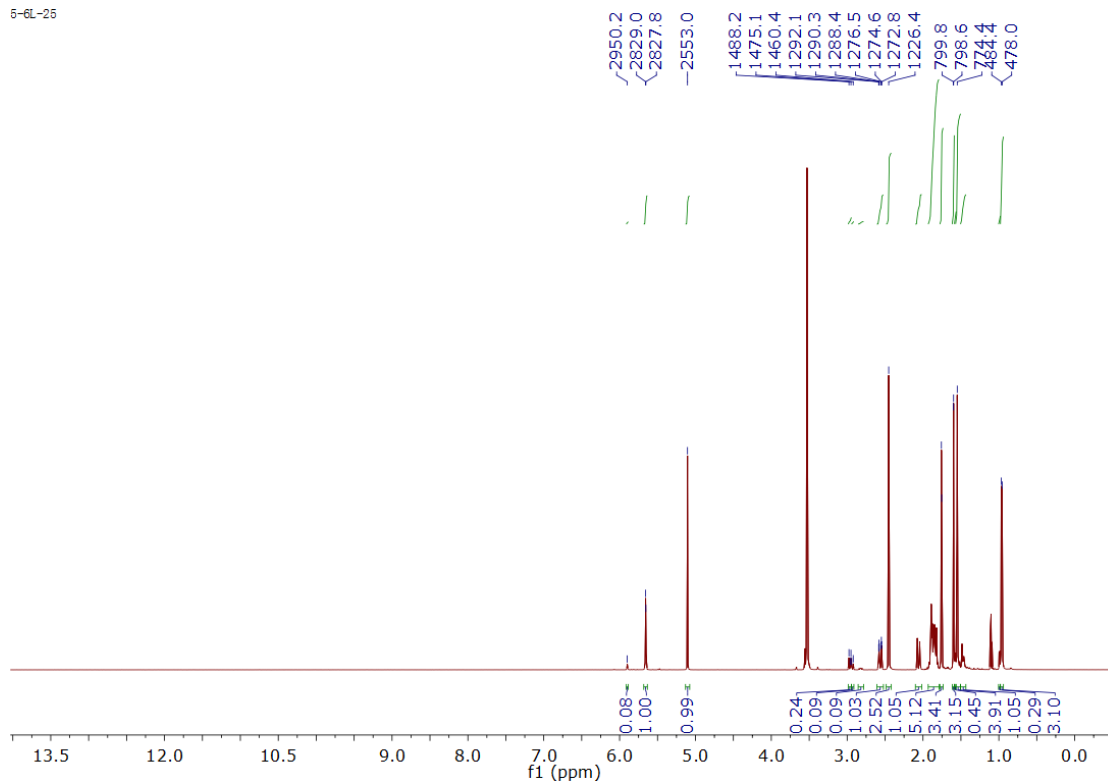

S20. <sup>1</sup>H NMR spectrum of curcumenol at 500 MHz in THF-d<sub>8</sub> (298.15 K).

5-6T-25

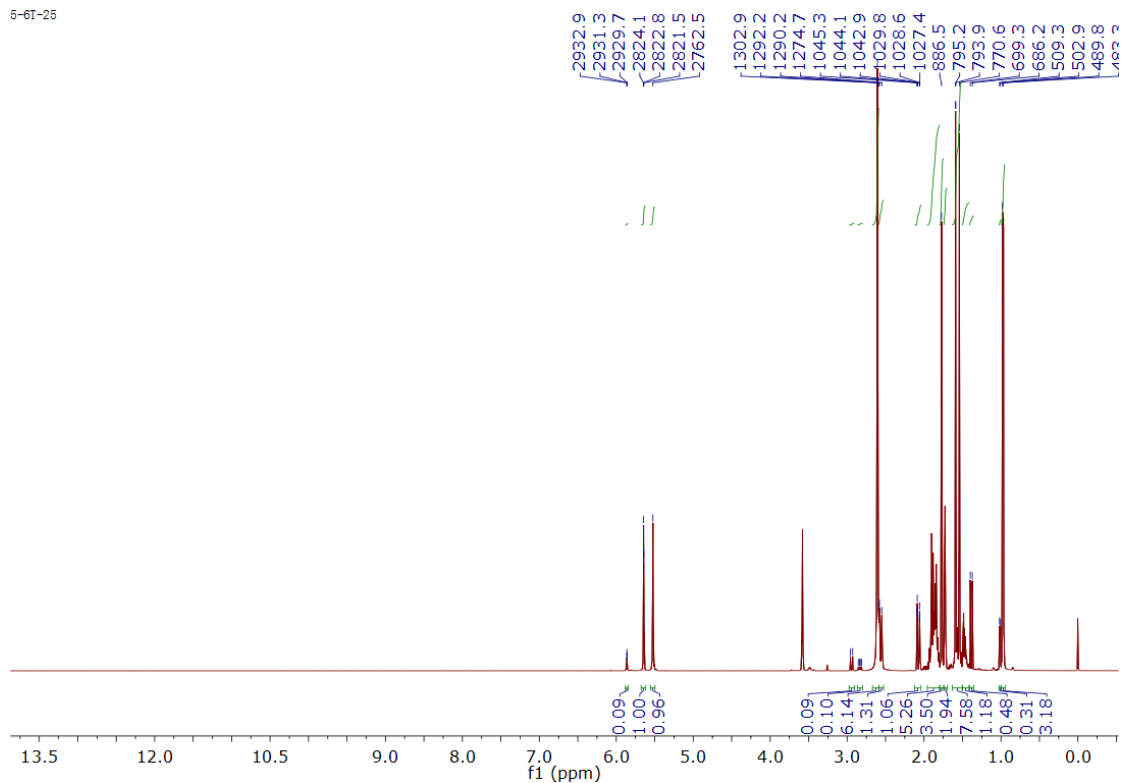

S21. <sup>1</sup>H NMR spectrum of curcumenol at 500 MHz in acetonitrile-d<sub>3</sub> (298.15 K).

5-6T-25

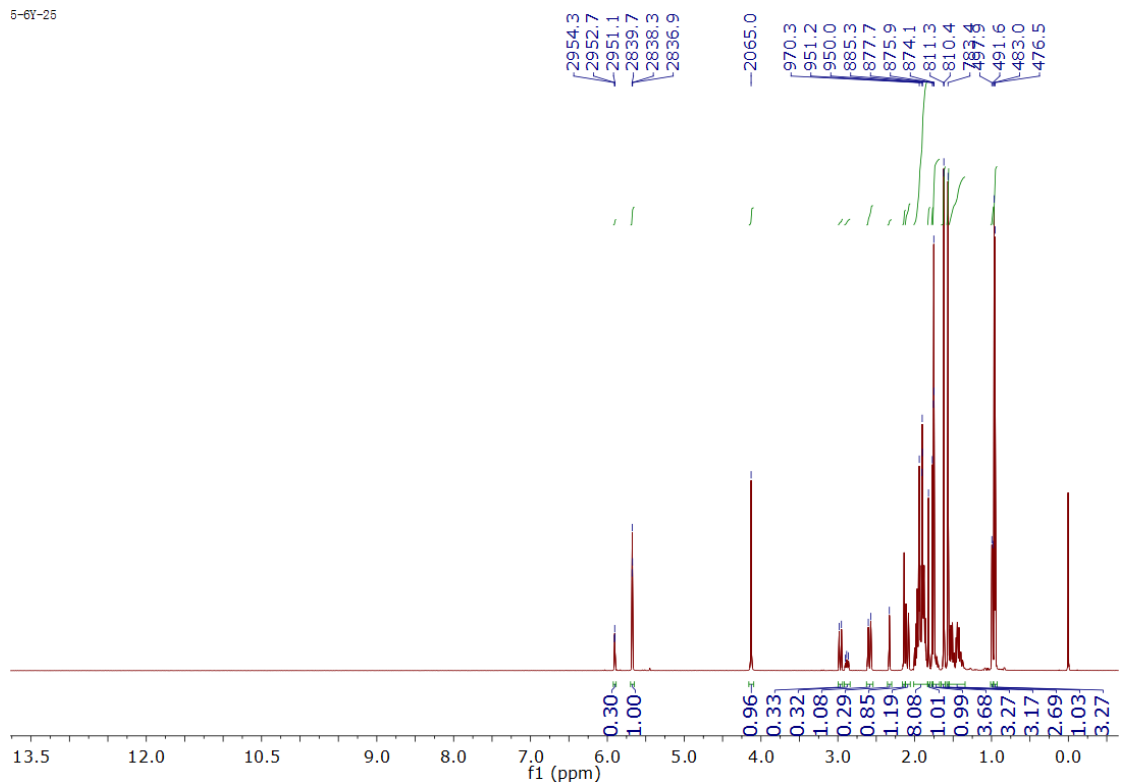

S22. <sup>1</sup>H NMR spectrum of curcumenol at 500 MHz in pyridine-d<sub>5</sub> (298.15 K).

5-6D-25

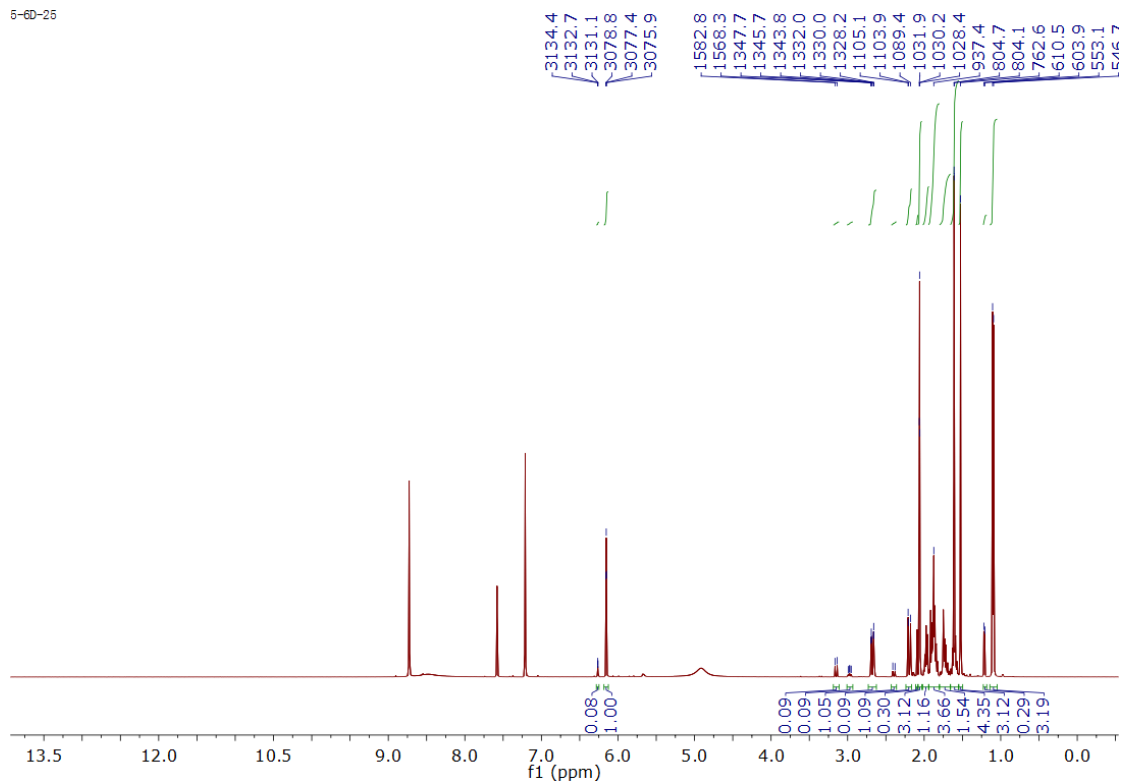

S23. <sup>1</sup>H NMR spectrum of acetylcurcumenol (1a) at 500 MHz in methanol-d<sub>4</sub>

YPA5

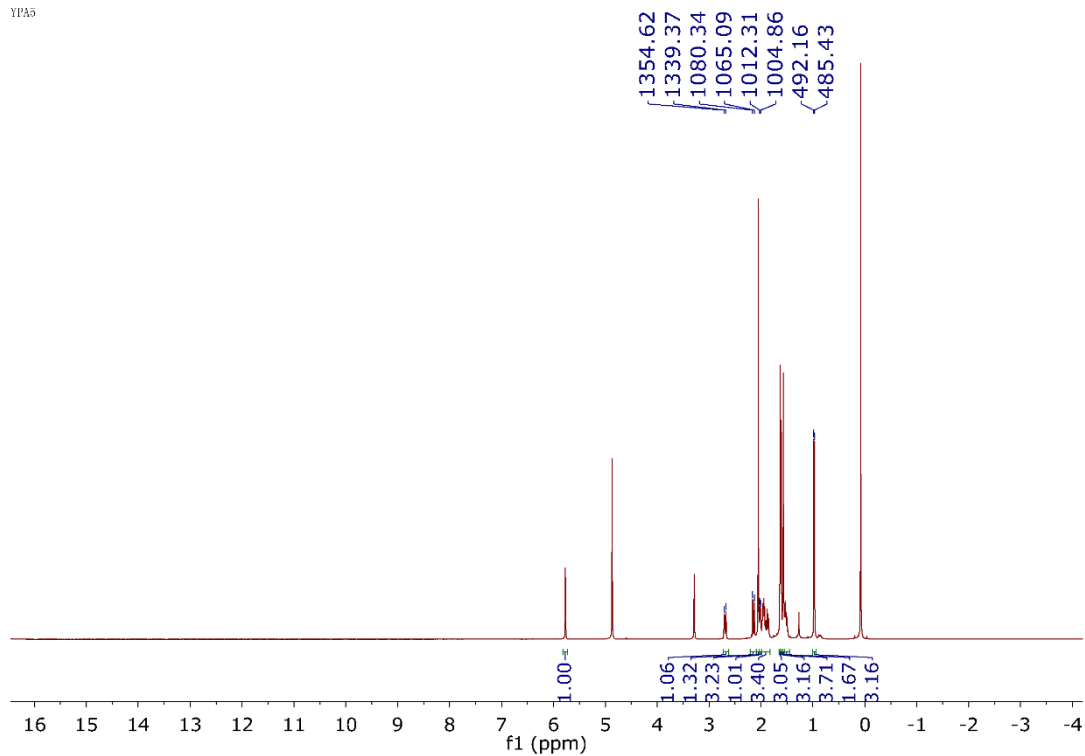

S24.  $^{13}\text{C}$  NMR spectrum of acetylcurcumenol (1a) at 125 MHz in methanol- $d_4$

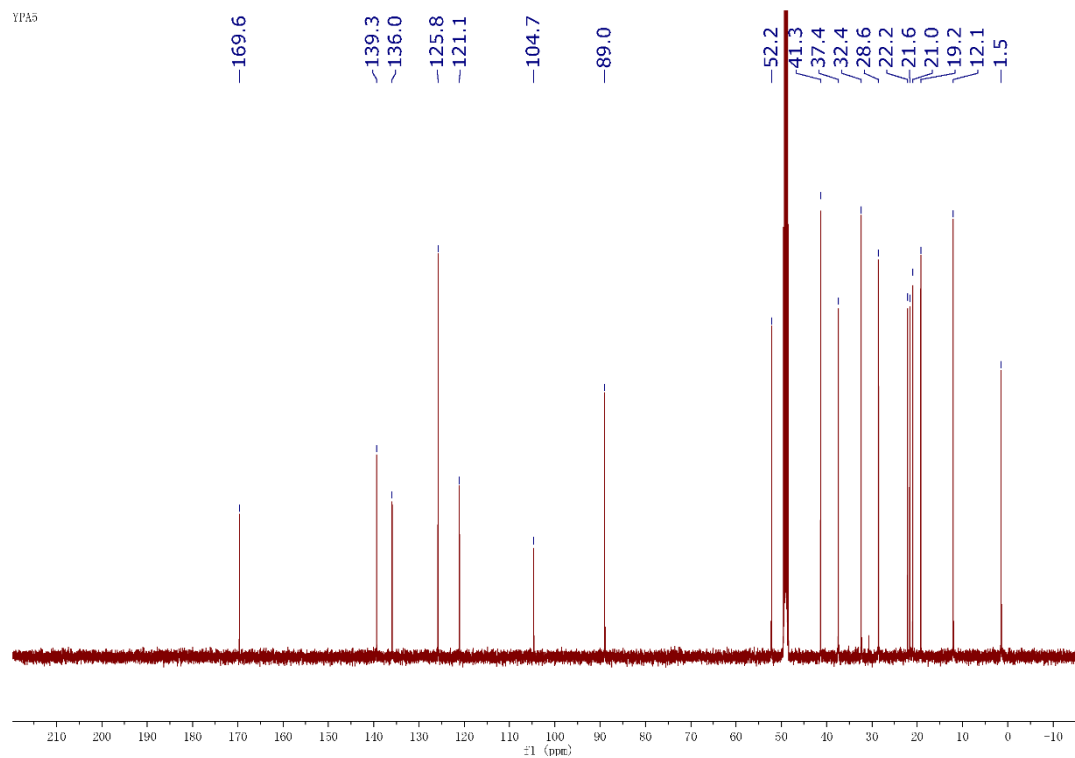

S25. HMBC spectrum of acetylcurcumenol (1a) at 125 MHz in methanol- $d_4$

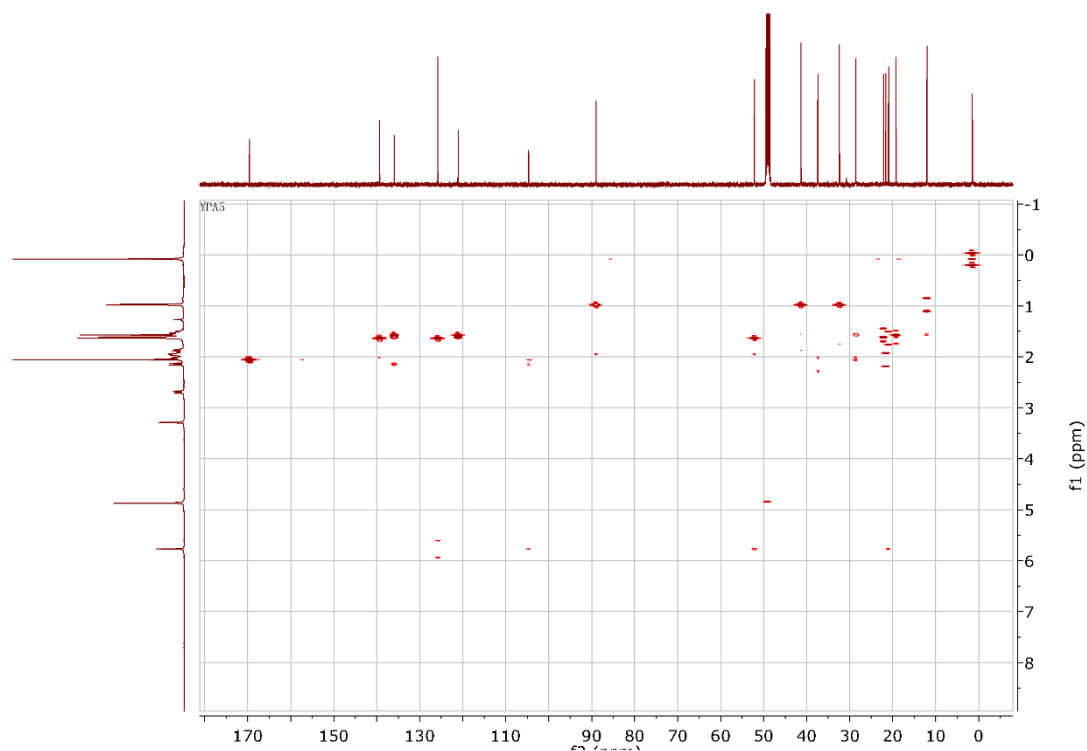



S26. HMQC spectrum of acetylcurcumenol (1a) at 125 MHz in methanol-*d*<sub>4</sub>

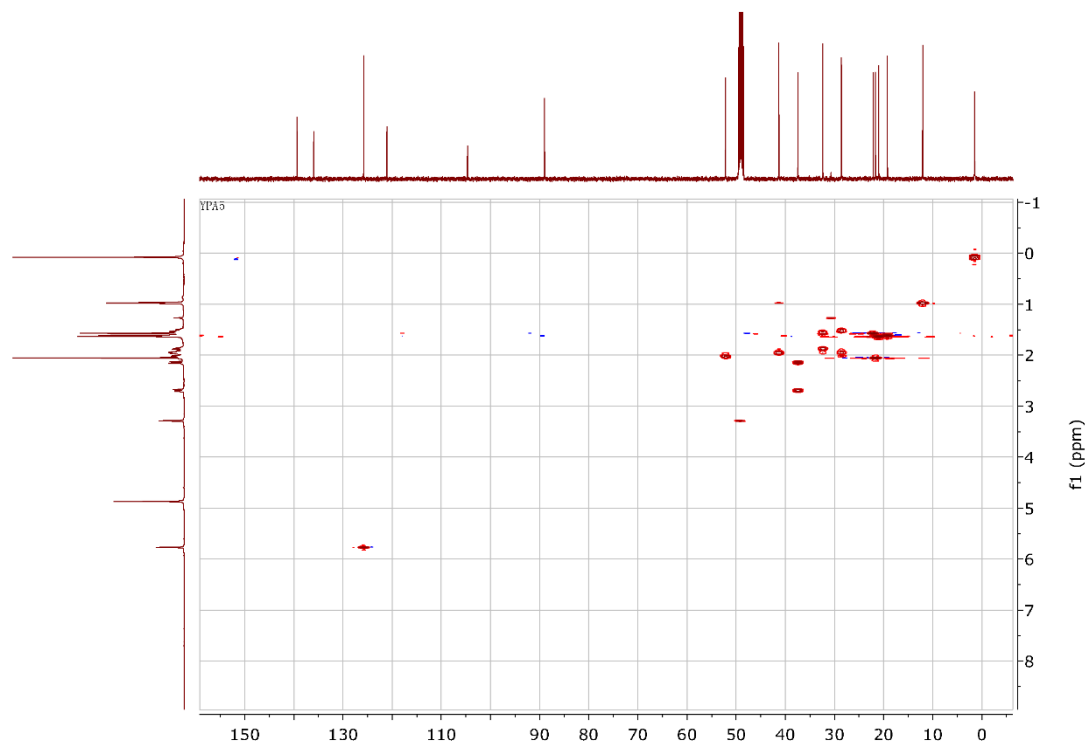

S27. NOESY spectrum of acetylcurcumenol (1a) at 500 MHz in methanol-*d*<sub>4</sub>

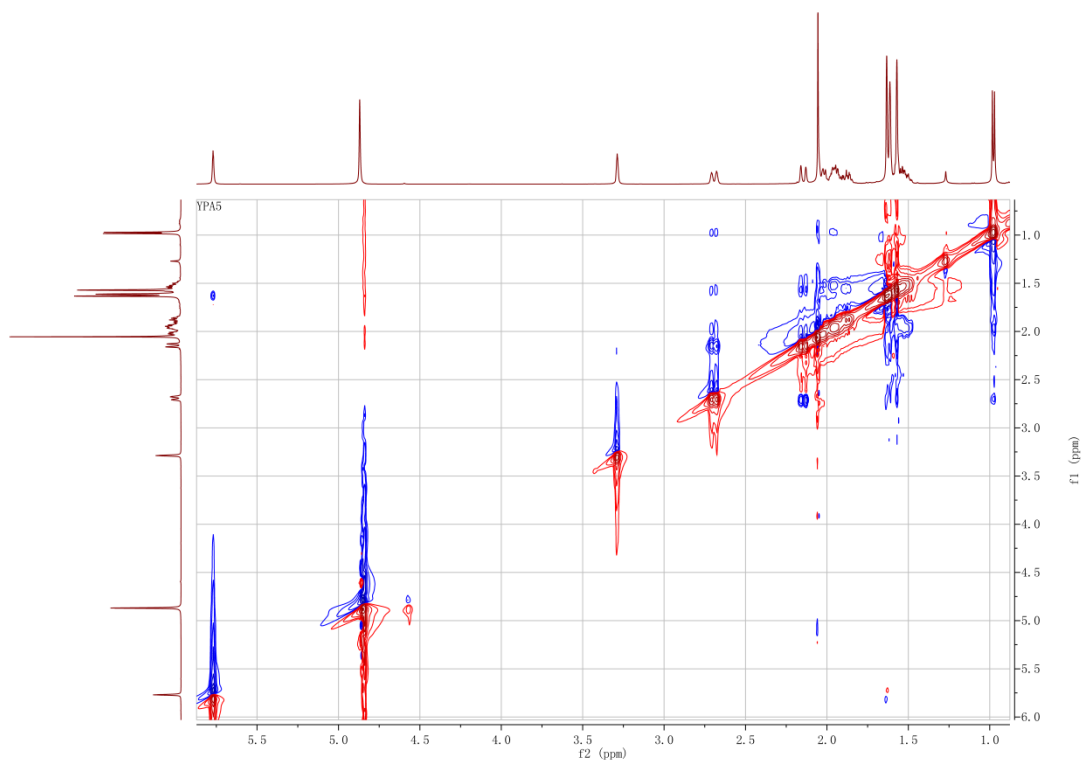

**S28.  $^1\text{H}$  NMR spectrum of byproducts of acetylation at 500 MHz in methanol- $d_4$ .**

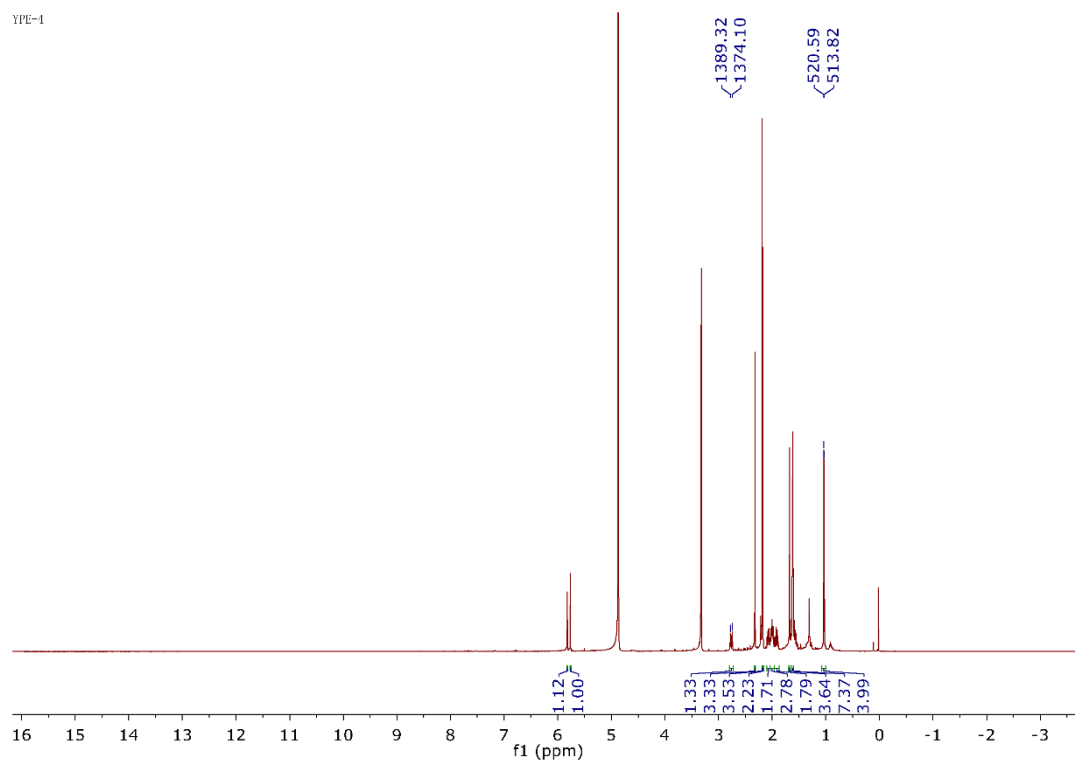

**S29.  $^{13}\text{C}$  NMR spectrum of byproducts of acetylation at 500 MHz in methanol- $d_4$**

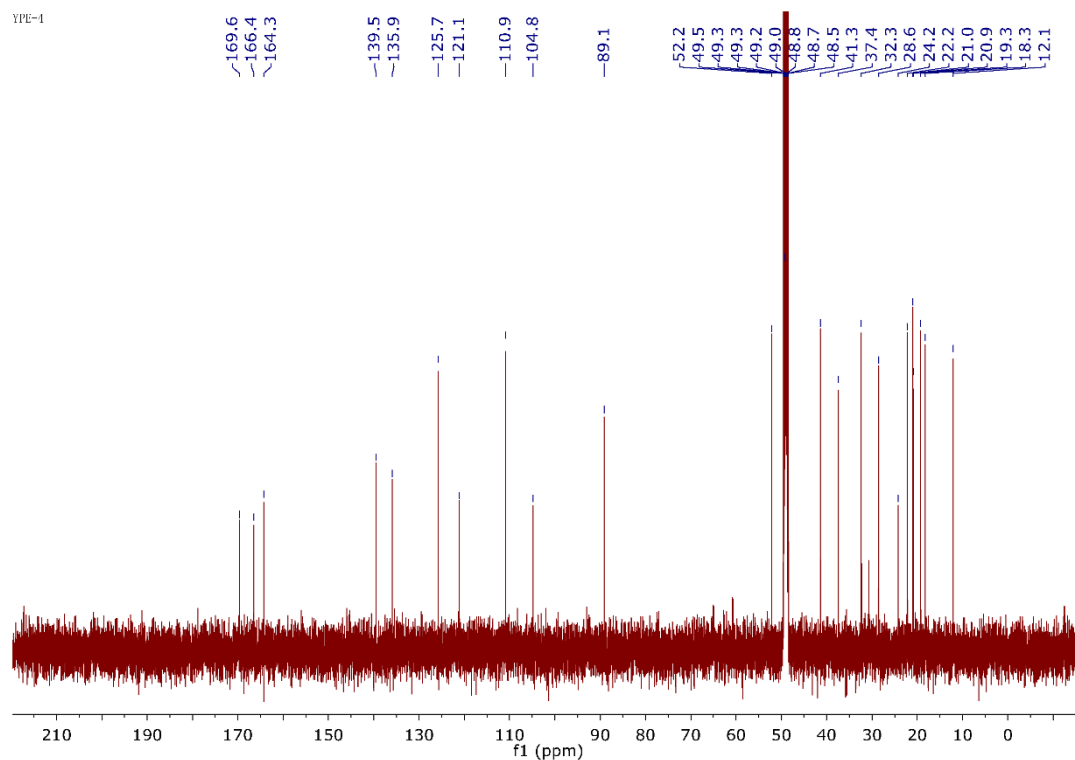

S30. <sup>1</sup>H NMR spectrum of methylcurcumenol (1b) at 500 MHz in methanol-d<sub>4</sub>

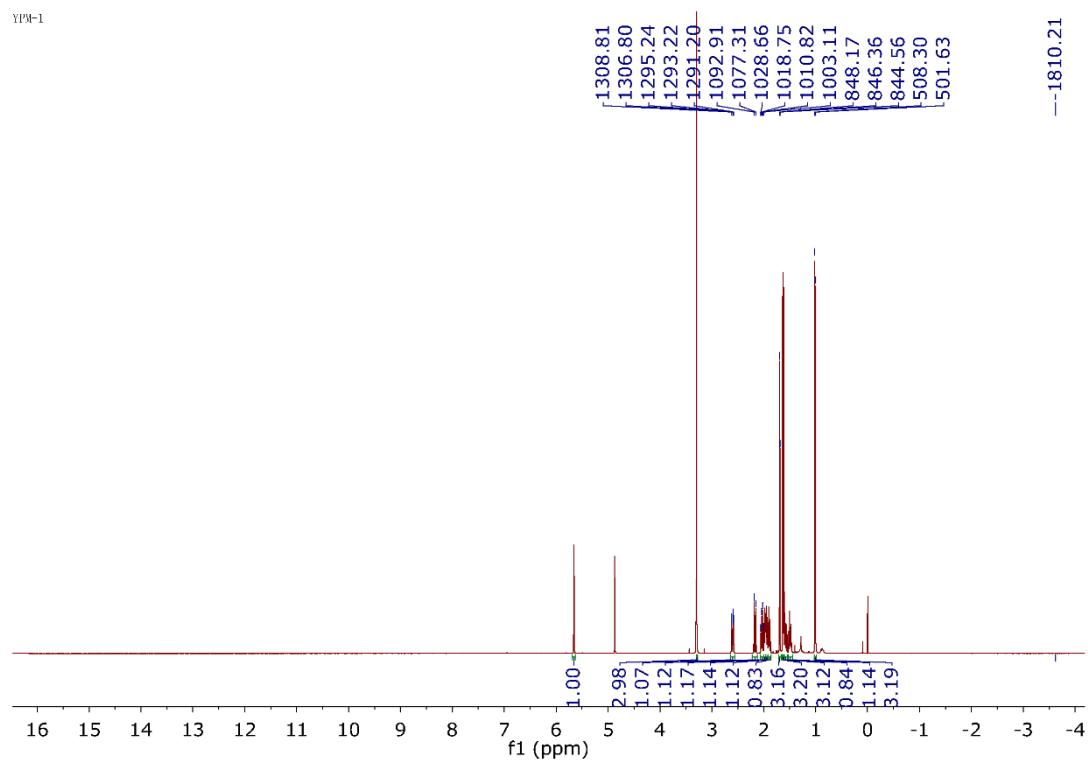

S31. <sup>13</sup>C NMR spectrum of methylcurcumenol (1b) at 500 MHz in methanol-d<sub>4</sub>

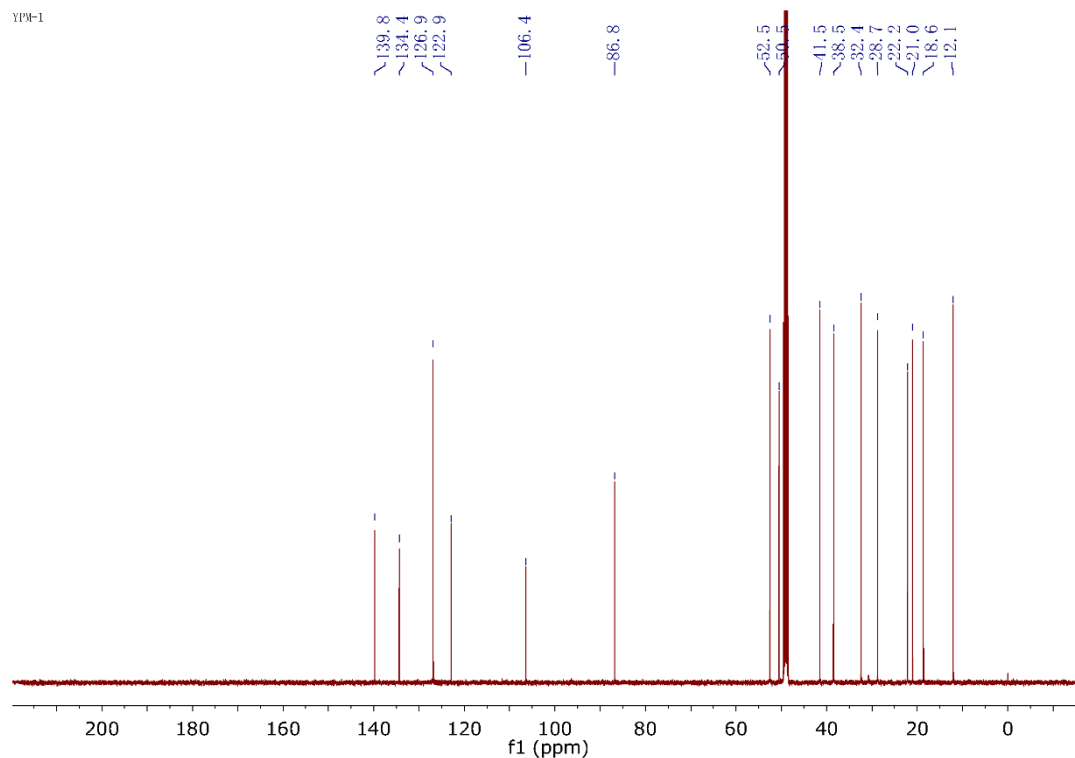

S32.  $^1\text{H}$  NMR spectrum of byproducts of methylation at 500 MHz in methanol- $d_4$

YPM-2

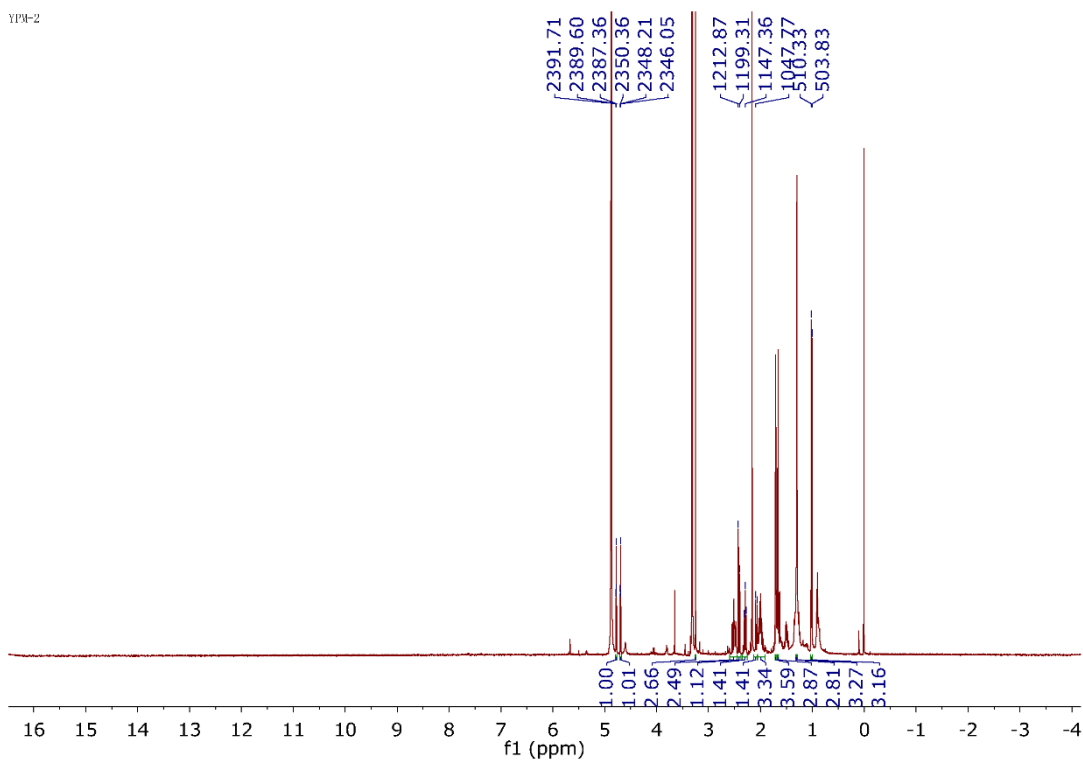

S33.  $^1\text{H}$  NMR spectrum of byproducts of methylation at 500 MHz in methanol- $d_4$

YPM-3

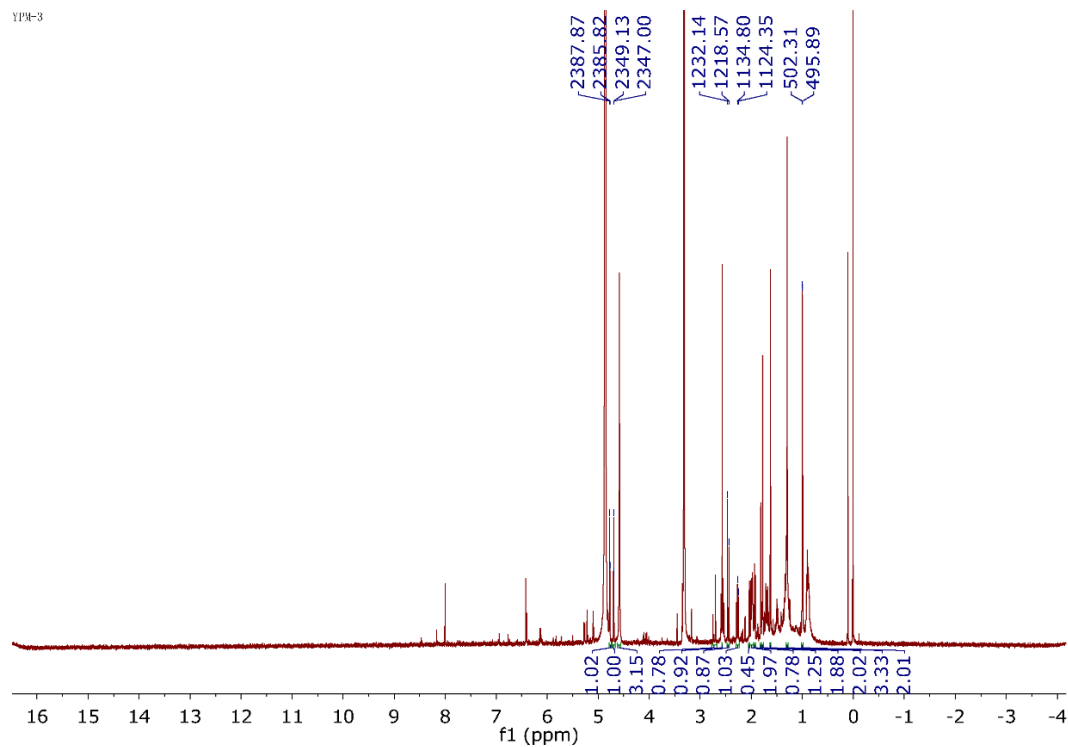

S34. <sup>1</sup>H NMR spectrum of 12-hydroxycurcumenol at 500 MHz in acetone-d<sub>6</sub>.

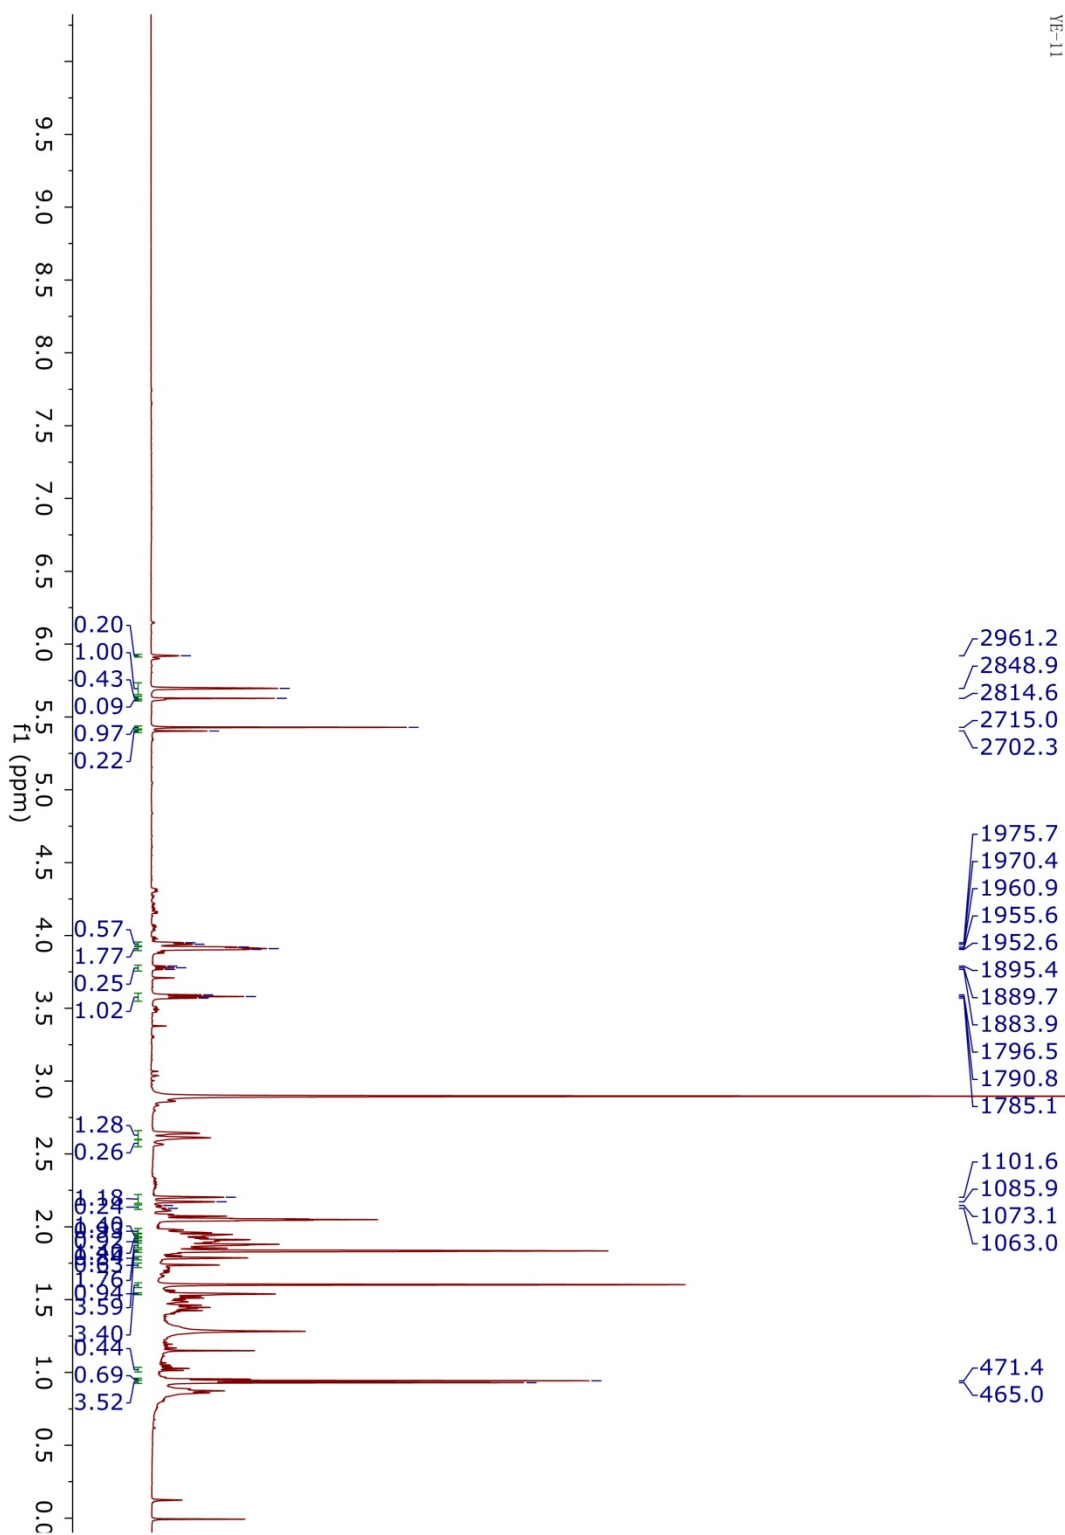

S35.  $^{13}\text{C}$  NMR spectrum of 12-hydroxycurcumenol at 125 MHz in acetone- $d_6$ .

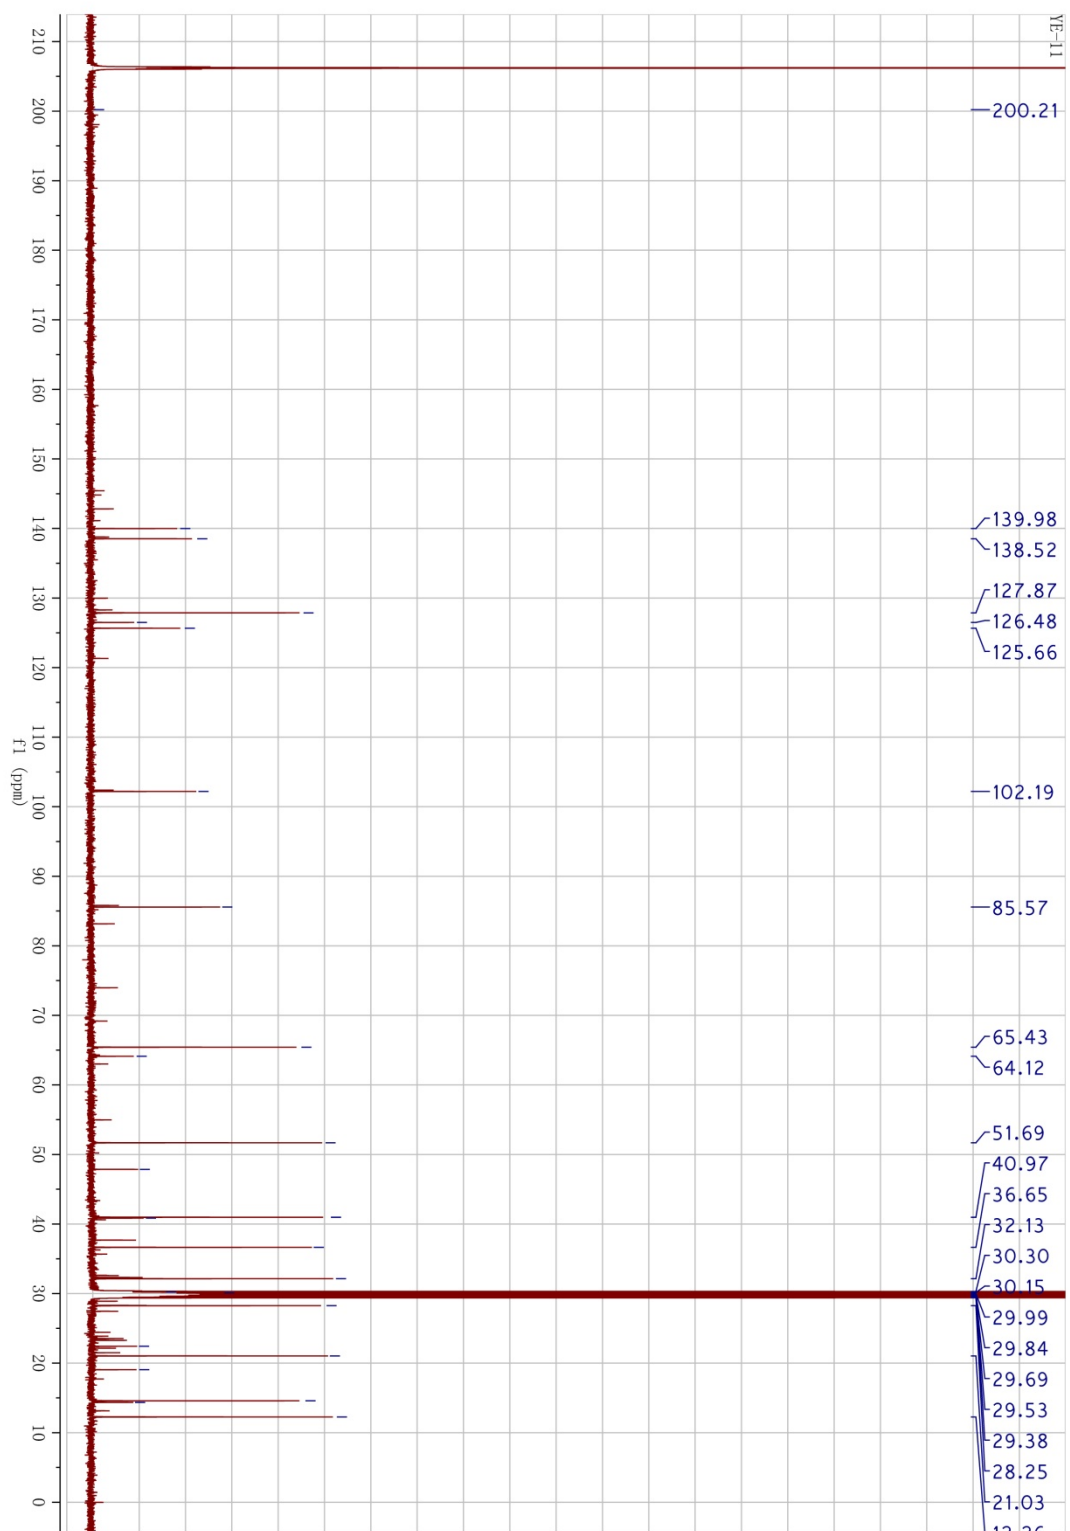

## Section II. Experimental

**S36. Table <sup>1</sup>H- (500 MHz) and <sup>13</sup>C-NMR (125 MHz) data of curcumenol (1) and curcumenotone (2) in CD<sub>3</sub>OD.**

**Table <sup>1</sup>H- (500 MHz) and <sup>13</sup>C-NMR (125 MHz) data of curcumenol (1) and curcumenotone (2) in CD<sub>3</sub>OD.**

| No. | <b>1</b>                                        |                     | <b>2</b>                                        |                     |
|-----|-------------------------------------------------|---------------------|-------------------------------------------------|---------------------|
|     | $\delta_{\text{H}}$                             | $\delta_{\text{C}}$ | $\delta_{\text{H}}$                             | $\delta_{\text{C}}$ |
| 1   | 2.00 m                                          | 52.4                | 2.90 dd (11.7, 8.3)                             | 52.4                |
| 2   | $\alpha$ 1.49 m<br>$\beta$ 1.97 m               | 28.7                | $\alpha$ 1.77 m<br>$\beta$ 1.98 m               | 24.1                |
| 3   | $\alpha$ 1.91 m<br>$\beta$ 1.59 m               | 32.3                | $\alpha$ 1.92 m<br>$\beta$ 1.46 m               | 30.1                |
| 4   | 1.93 q (6.6)                                    | 41.4                | 1.92 q (6.3)                                    | 42.3                |
| 5   |                                                 | 86.7                |                                                 | 86.6                |
| 6   | $\alpha$ 2.14 d (15.6)<br>$\beta$ 2.65 d (15.6) | 38.2                | $\alpha$ 1.93 d (14.7)<br>$\beta$ 3.03 d (14.7) | 36.2                |
| 7   |                                                 | 138.2               |                                                 | 141.5               |
| 8   |                                                 | 102.7               |                                                 | 200.7               |
| 9   | 5.69 q (1.2)                                    | 127.5               | 5.99 q (1.5)                                    | 129.9               |
| 10  |                                                 | 139.5               |                                                 | 160.8               |
| 11  |                                                 | 122.4               |                                                 | 135.8               |
| 12  | 1.59 s                                          | 22.4                | 1.82 br s                                       | 21.9                |
| 13  | 1.78 br s                                       | 19.1                | 1.86 s                                          | 22.5                |
| 14  | 1.00 d (6.6)                                    | 21.1                | 1.04 d (6.3)                                    | 24.6                |
| 15  | 1.64 d (1.2)                                    | 12.2                | 1.97 br s                                       | 13.1                |

**S37. HR-LC-MS analysis**

Column: Agilent Extend-C18 3.5  $\mu\text{m}$  3.0 X 100 mm

Elution procedure:

0-6 min 5%-95% methanol-water (with 0.1% formic acid)

6-10 min 95% methanol-water (with 0.1% formic acid)

TIC chromatographic spectrum and MS spectrum of the main peak:

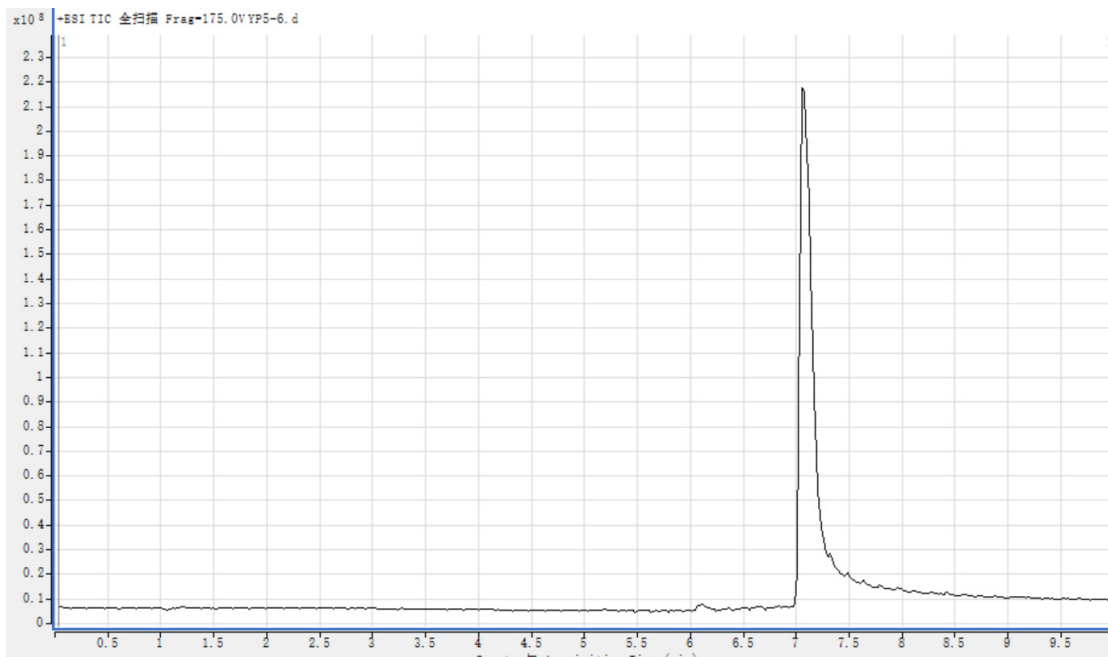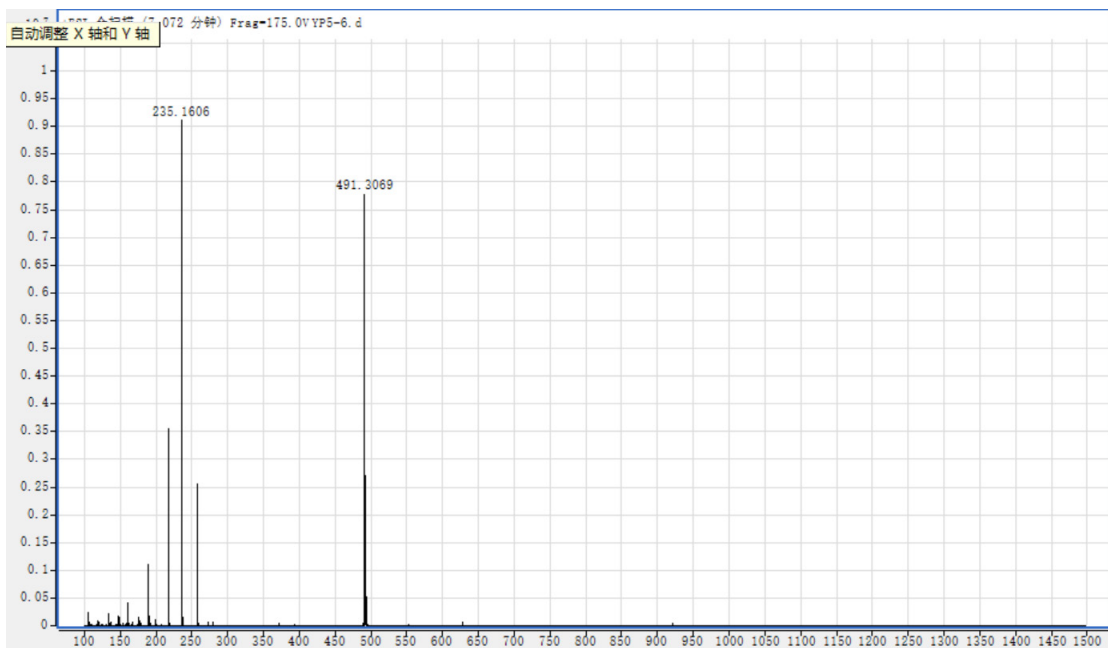



UV 254 nm chromatographic spectrum:

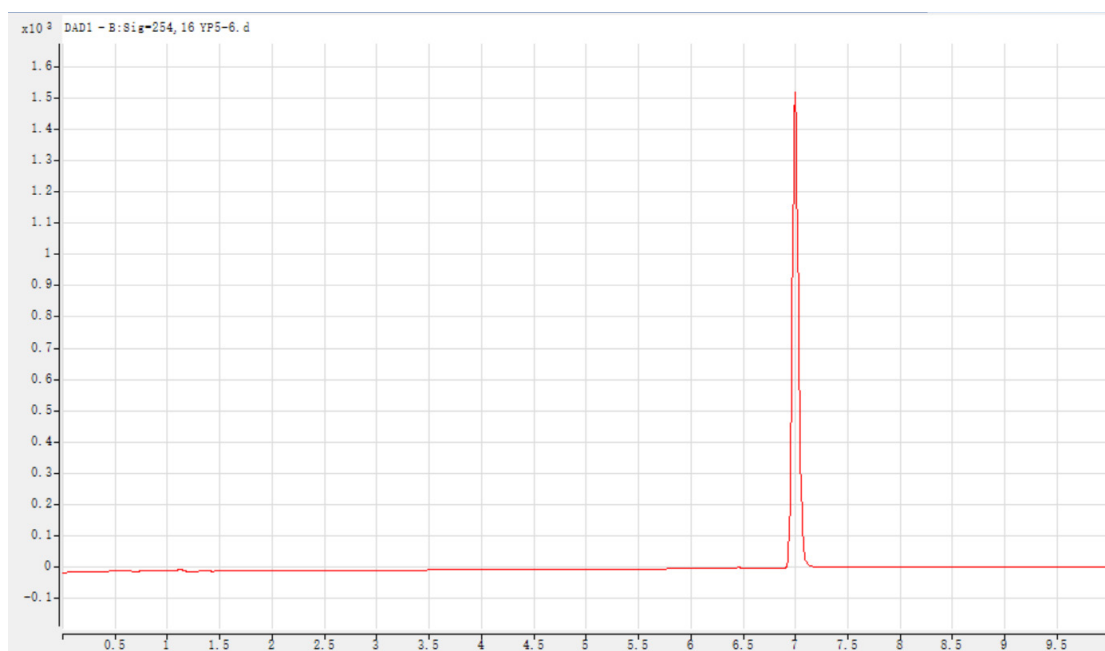

214 nm chromatographic spectrum:

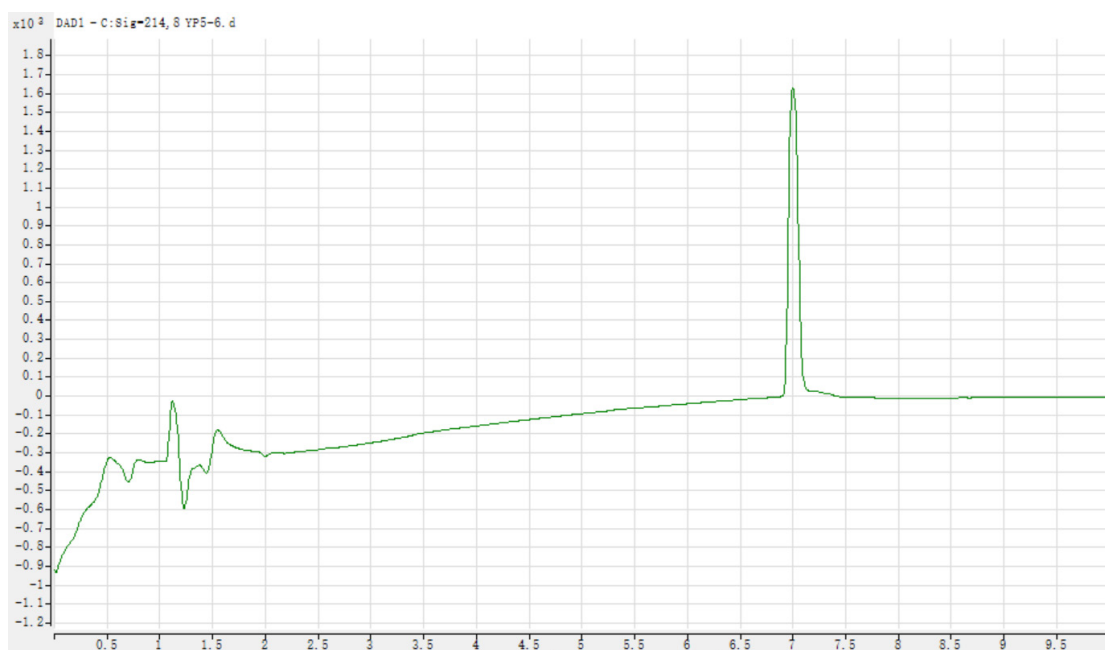

**S38. HR-LC-MS analysis of the resulted acetylation mixture:**

TIC chromatographic spectrum and MS spectrum of the main peak:

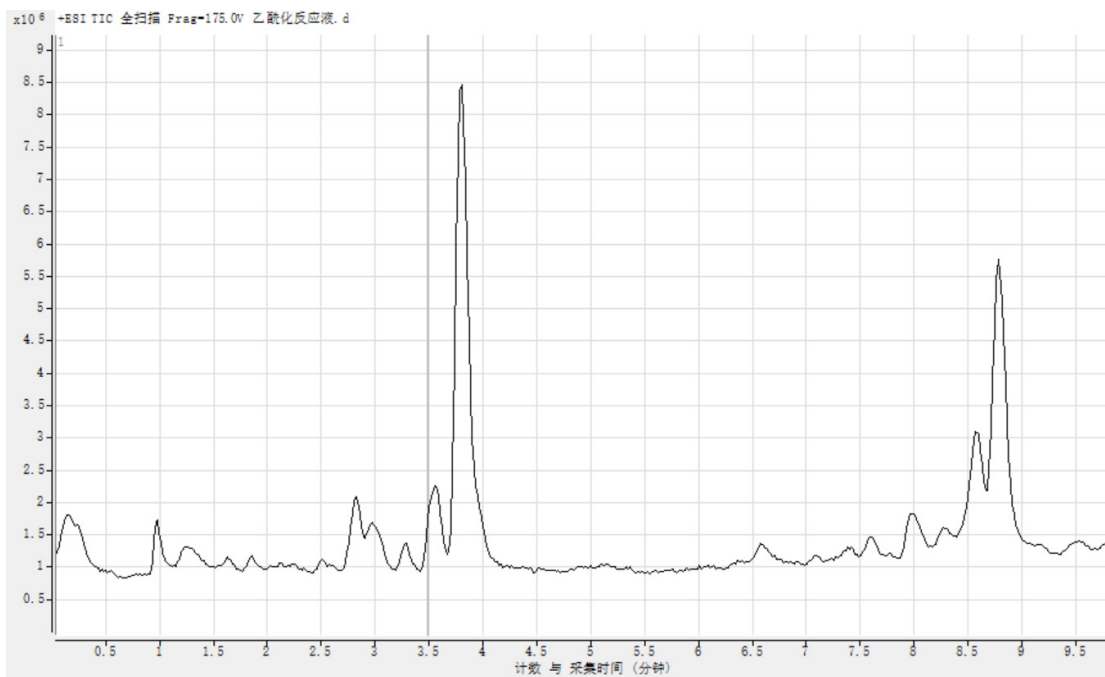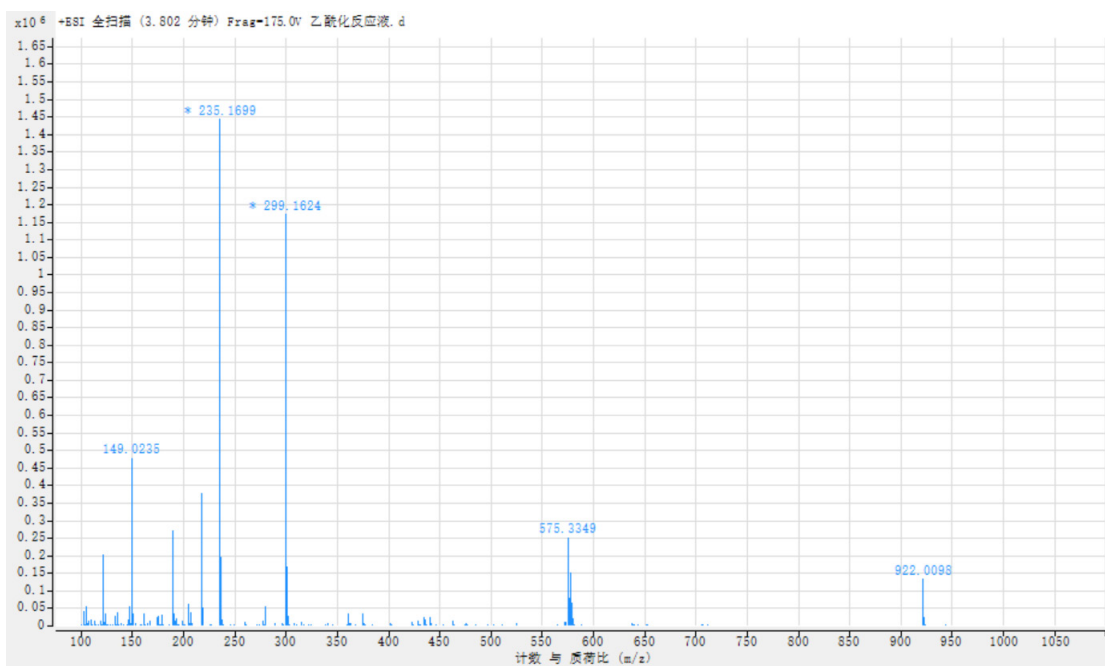

**1a:** Calcd for  $C_{17}H_{24}O_3Na^+$   $[M + H]^+$  299.1618, found 299.1624.

254 nm chromatographic spectrum:

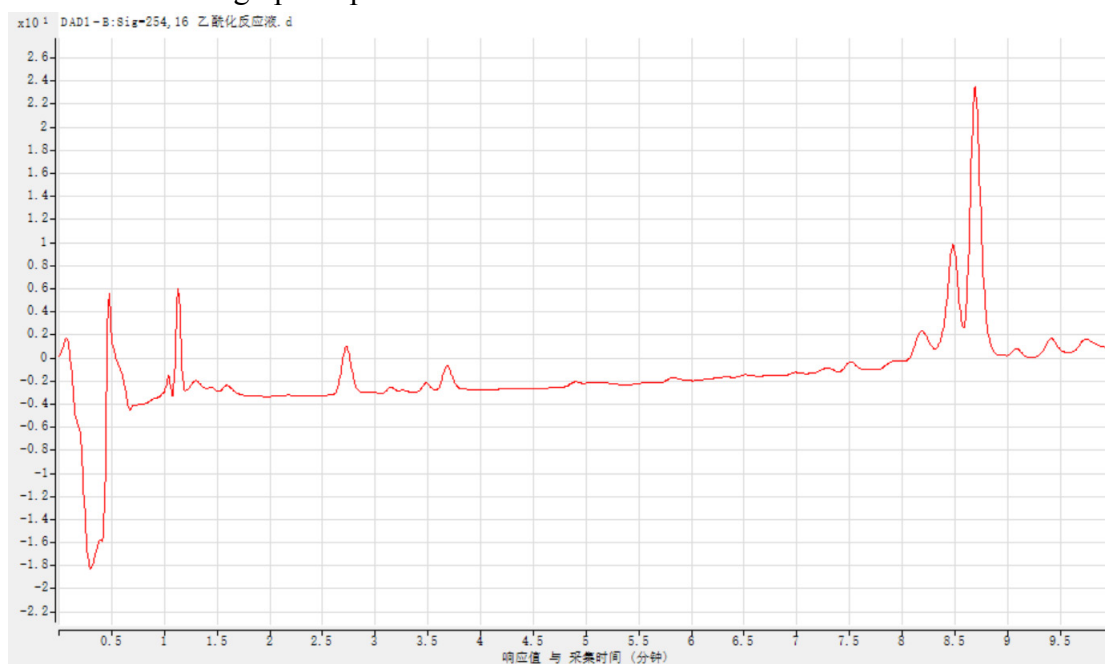

210 nm chromatographic spectrum:

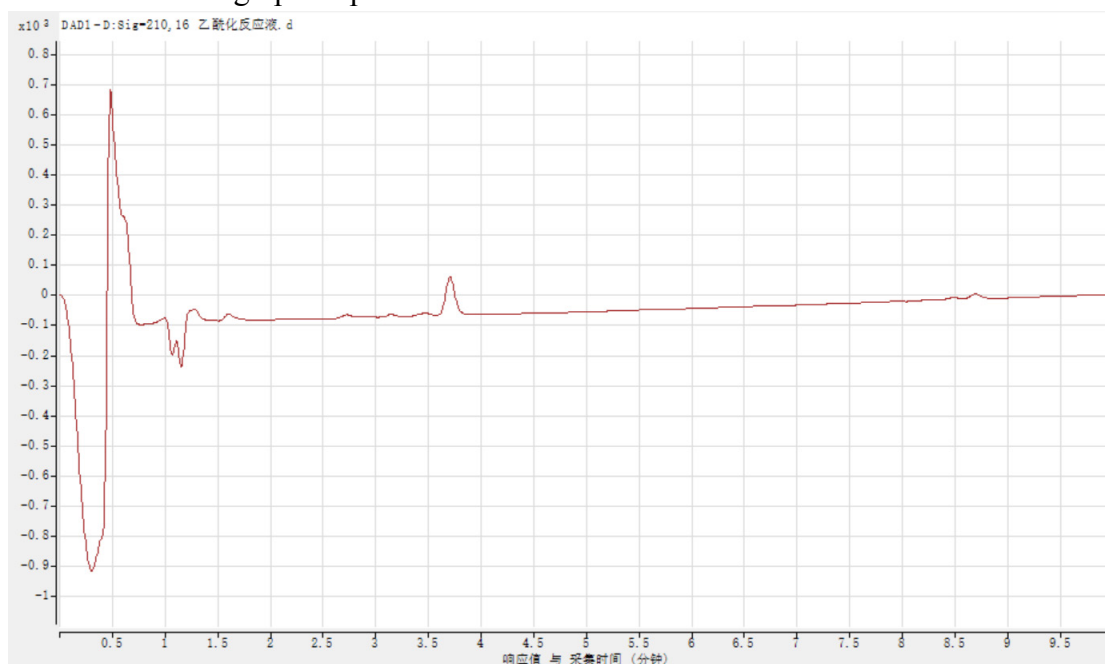

**S39. HR-LC-MS analysis of the resulting methylation mixture:**

TIC chromatographic spectrum and MS spectrum of the main peaks:

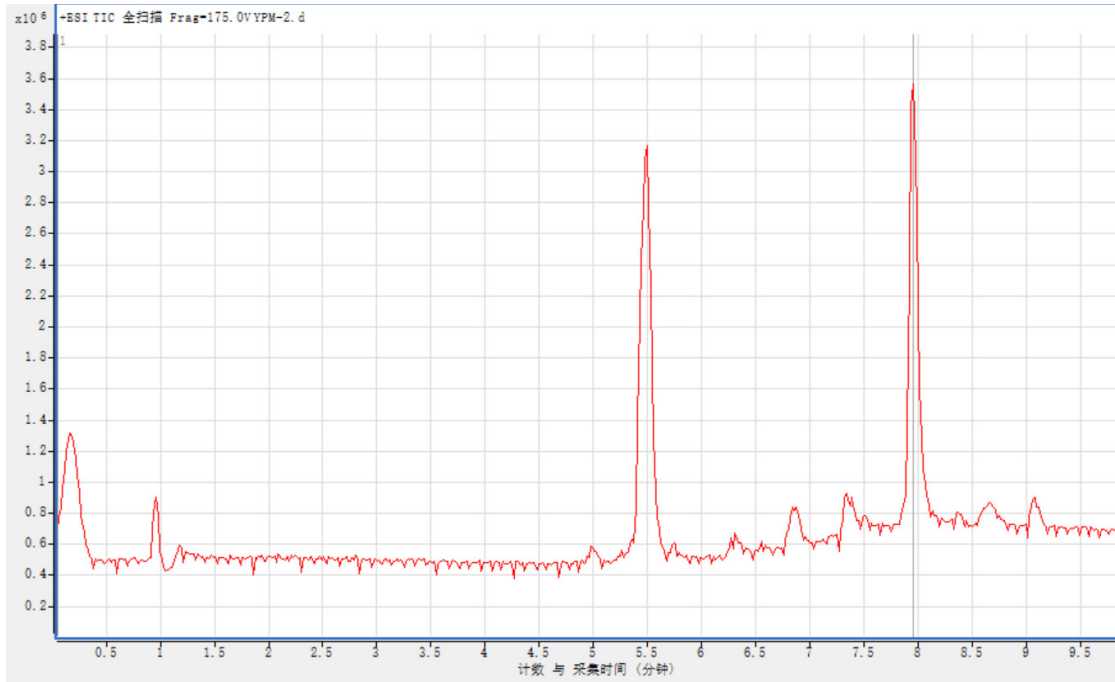

MS spectrum of peak at 5.492 min

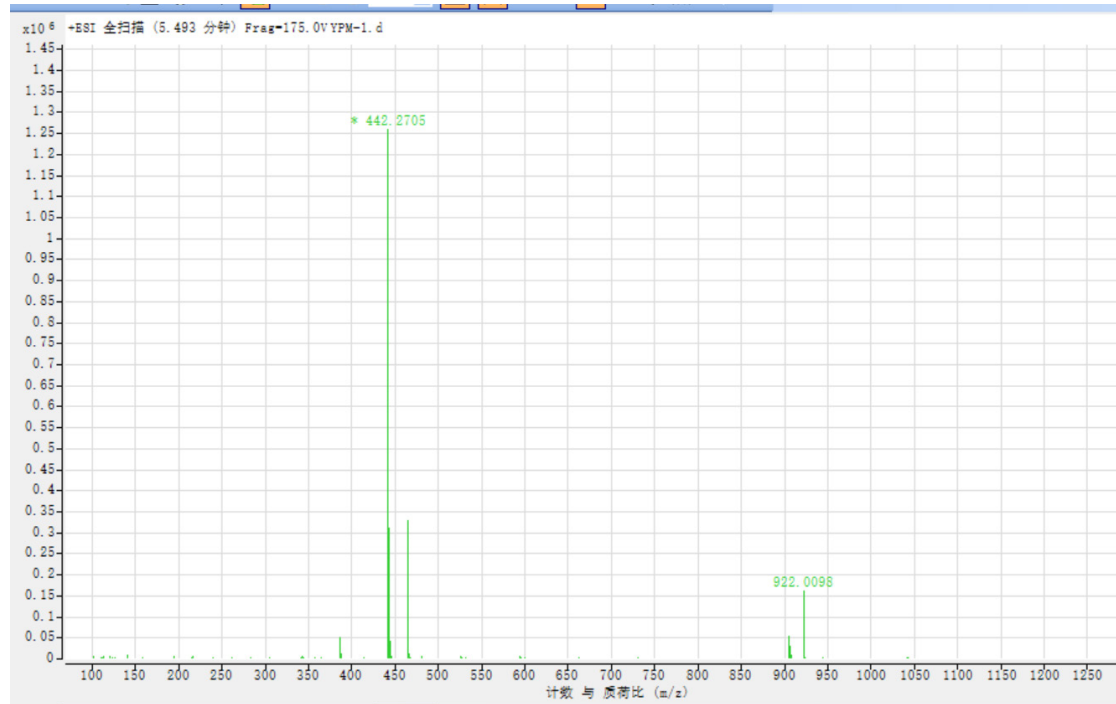

### MS spectrum of peak at 6.289 min

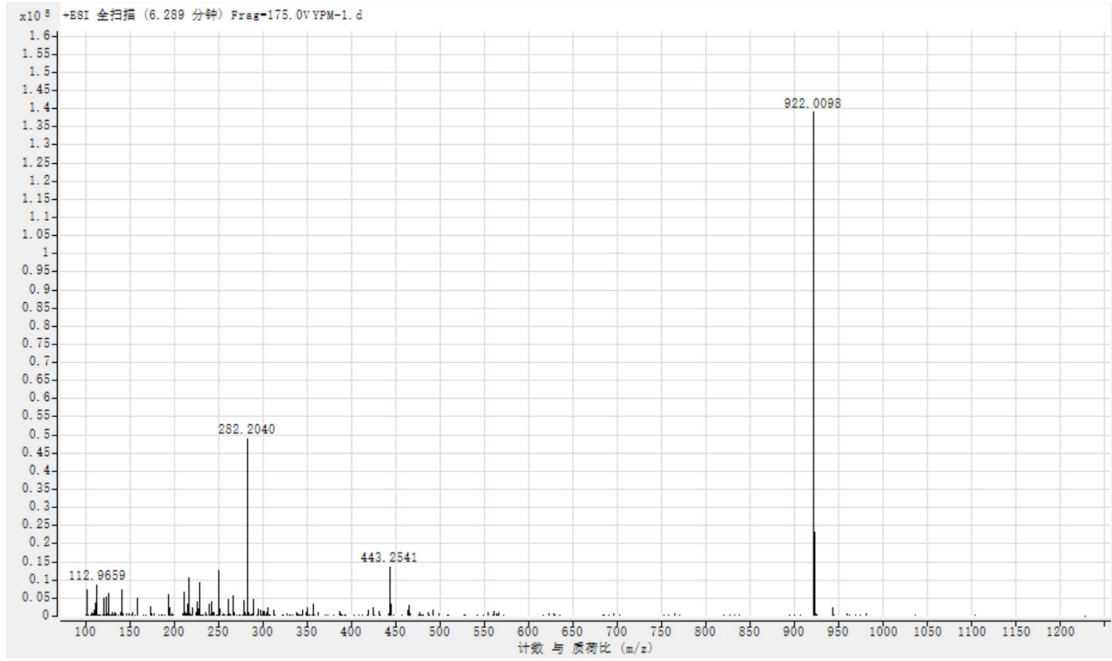

### MS spectrum of peak at 6.853 min

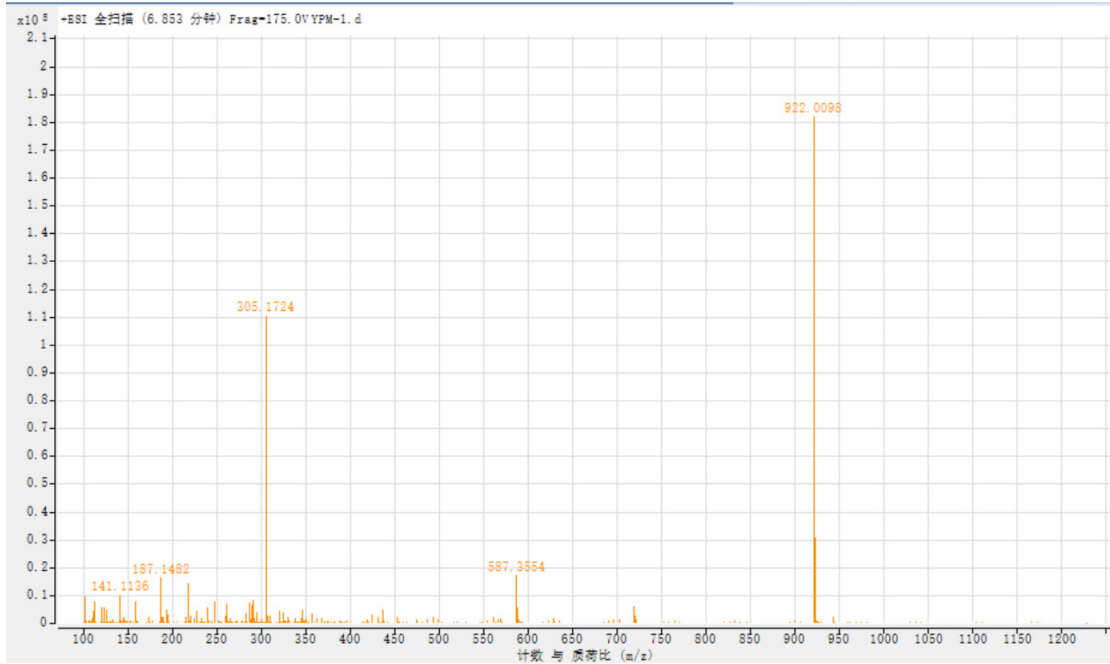

### MS spectrum of peak at 7.351 min

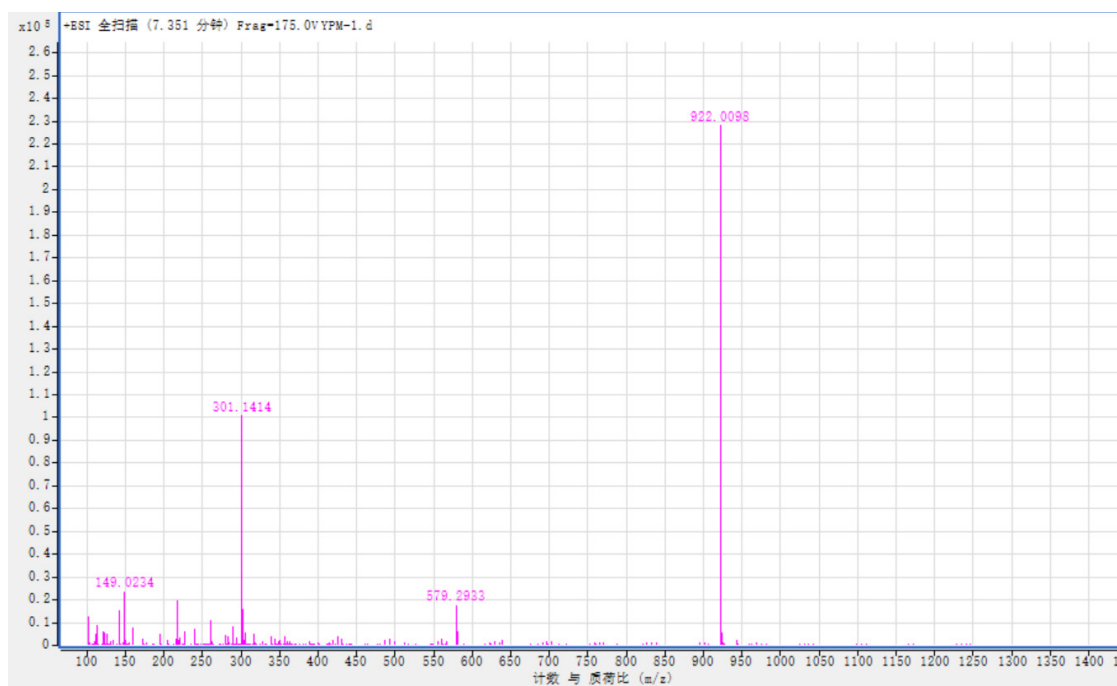

### MS spectrum of peak at 7.949 min (methylcurcumenol, **1b**)

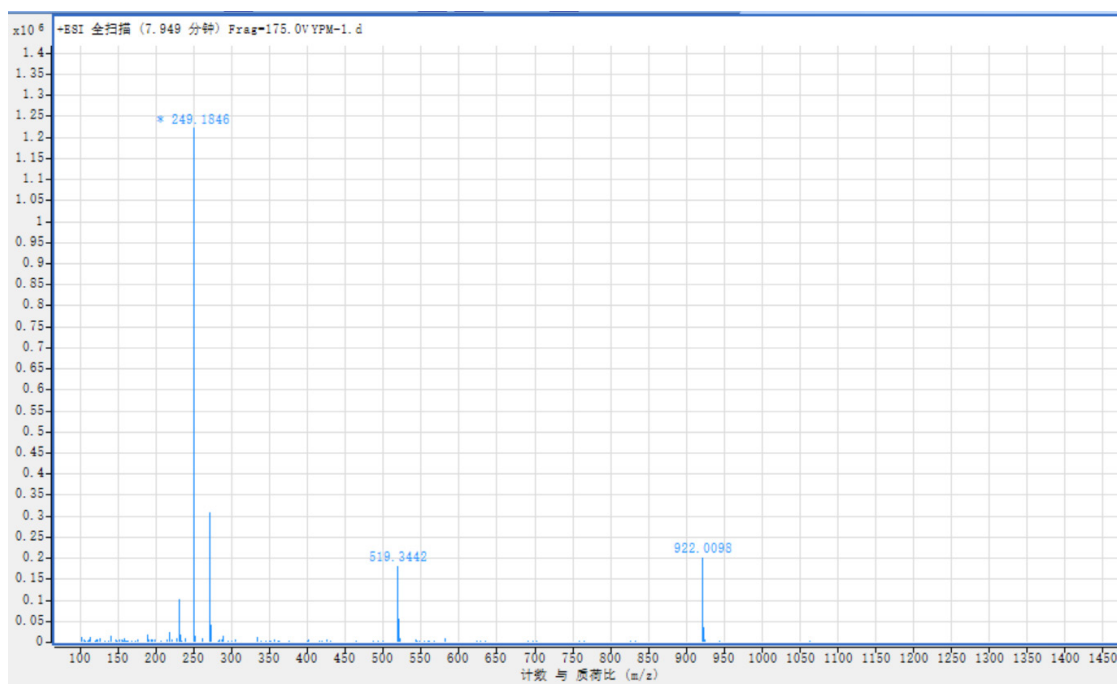

**1b**: Calcd for C<sub>16</sub>H<sub>25</sub>O<sub>2</sub><sup>+</sup> [M + H]<sup>+</sup> 249.1849, found 249.1846.

UV 254 nm chromatographic spectrum:

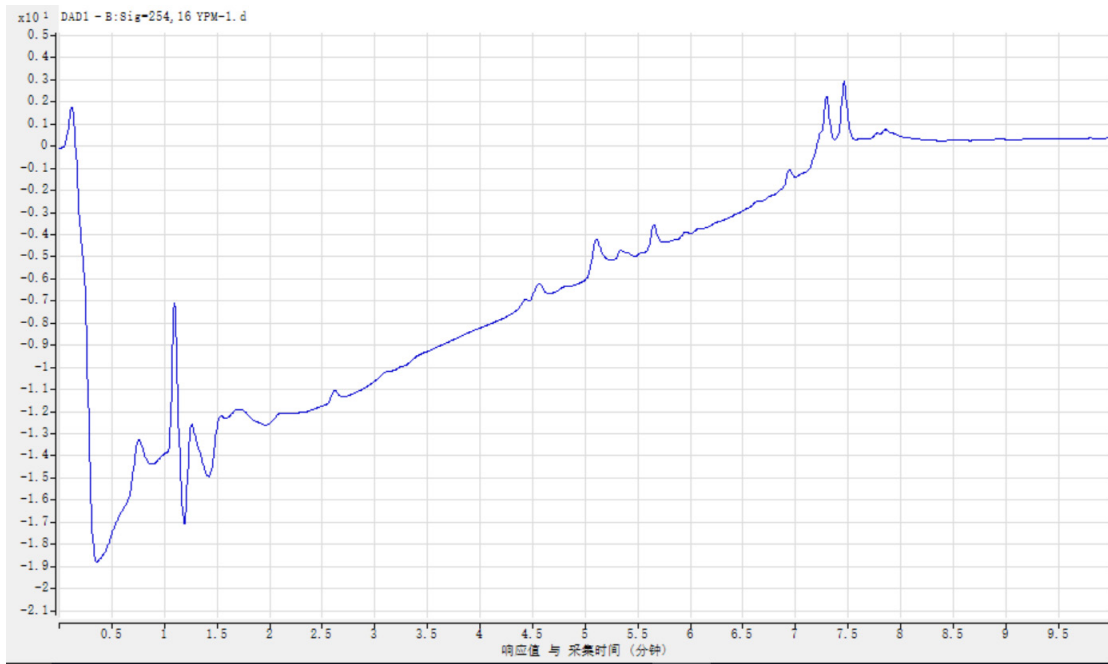

UV 214 nm chromatographic spectrum:

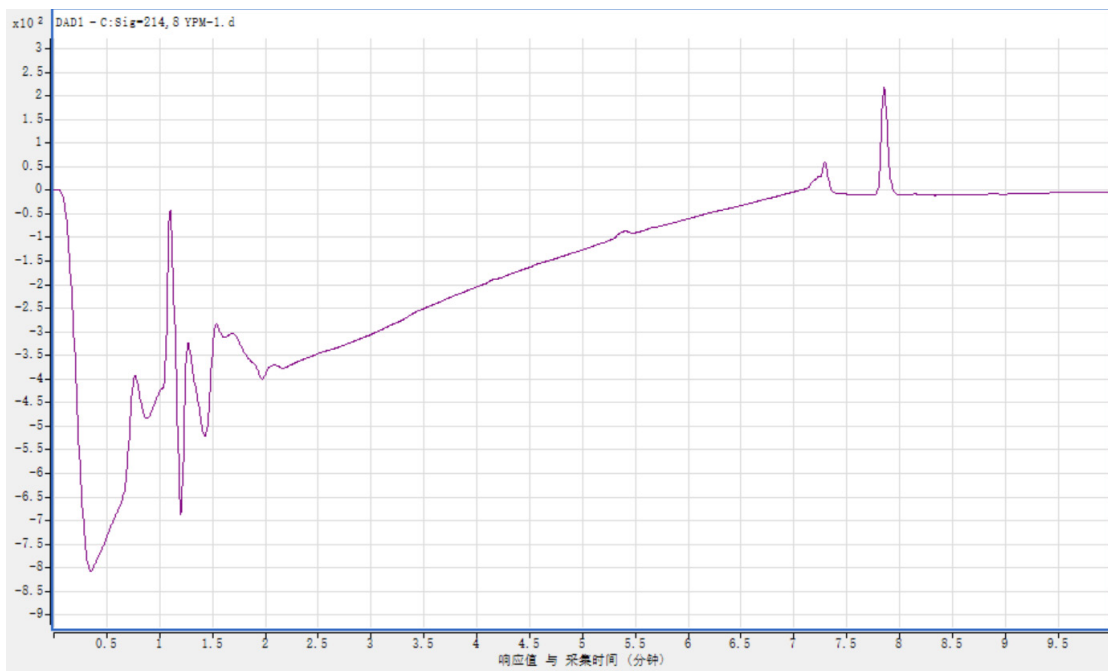

**S40. Solvents parameters table<sup>a</sup>**

| solvents          | 2:1 ratio | Hansen Solubility Parameters |            |       |                  | polarity | electrical conductivity<br>S/m, $\times 10^{-8}$ | polarizability<br>$\text{cm}^3, \times 10^{-24}$ | dielectric<br>constant <sup>b</sup> | dipole<br>moment | surface<br>tension <sup>b</sup> |
|-------------------|-----------|------------------------------|------------|-------|------------------|----------|--------------------------------------------------|--------------------------------------------------|-------------------------------------|------------------|---------------------------------|
|                   |           | Total                        | Dispersion | Polar | Hydrogen Bonding |          |                                                  |                                                  |                                     |                  |                                 |
| acetonitrile      | 0.3       | 24.3                         | 15.3       | 17.9  | 6.1              | 6.2      | 0.06                                             | 4.45                                             | 37.5                                | 11.8             | 19.1                            |
| methanol          | 0.22      | 29.6                         | 15.1       | 12.3  | 22.3             | 6.6      | 0.15                                             | 3.25                                             | 33.6                                | 5.7              | 22.55                           |
| acetone           | 0.17      | 20                           | 15.5       | 10.4  | 7                | 5.4      | 5.8                                              | 6.33                                             | 20.7                                | 9                | 23.32                           |
| dimethylsulfoxide | 0.16      | 26.7                         | 18.4       | 16.4  | 10.2             | 7.2      | 3                                                | 7.99                                             | 47.2                                | 13.5             | 43.6                            |
| benzene           | 0.13      | 18.6                         | 18.4       | 0     | 2                | 3        | 7.6                                              | 10.4                                             | 2.29                                | 0                | 28.2                            |
| THF               | 0.09      | 19.4                         | 16.8       | 5.7   | 8                | 4.2      | -                                                | 7.94                                             | 7.58                                | 5.8              | 28.8                            |
| 1,4-dioxane       | 0.08      | 20.5                         | 19.1       | 1.9   | 7.4              | 4.8      | <2                                               | 8.58                                             | 2.21                                | 1.5              | 31.2                            |
| pyridine          | 0.08      | 21.9                         | 19         | 8.8   | 5.9              | 5.3      | 4                                                | 9.65                                             | 12.3                                | 7.9              | 35.2                            |

<sup>a</sup> Data collected from Knovel database at <https://app.knovel.com>

<sup>b</sup> parameters may associate with 2:1 ratio.



#### S41. MTT assay and CCK8 cytotoxicity assay

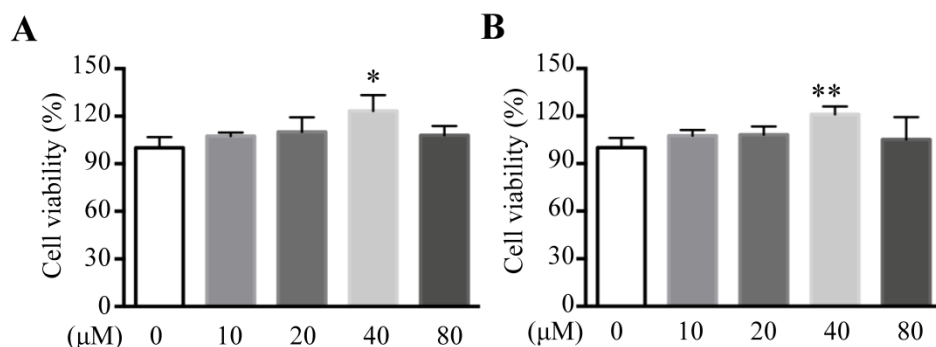

**Figure** Curcumenol promoted proliferation in C2C12 cells. Cell viabilities were assessed using MTT (A) and CCK-8 (B) cytotoxicity assay. Data are shown as mean  $\pm$  S.D.,  $n = 6-8$ . \* $p < 0.05$ , \*\* $p < 0.01$ , curcumenol vs. DMSO.

#### S42. DPPH free radical-scavenging assay

(1) Test samples

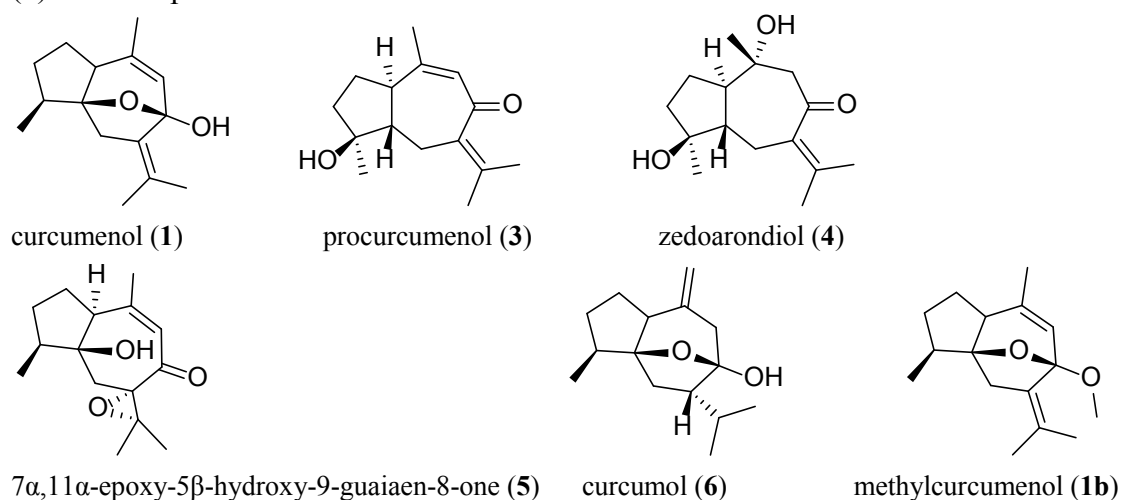

**Positive control:** ascorbic acid and quercetin.

(2) Isolation and structure identification of compounds 1-6.

*Plant material.* Root tubers of *C. wenyujin* (5 kg) were purchased from Zhejiang province of China in June, 2015 and authenticated by one of the authors (J. X. Mo). A voucher specimen has been deposited in the Institute of Modern Chinese Medicine, Zhejiang University (accession number CW-2015-I).

*Extraction and isolation.* The dried root tubers of *C. wenyujin* (5 Kg) were ground and extracted

with 25 L 95% EtOH (7 days ×3) at room temperature. After removal of the solvent under reduced pressure, a crude extract CW (113.1 g) was obtained, which was suspended in 2 L of H<sub>2</sub>O and partitioned successively with petroleum ether, EtOAc, and *n*-BuOH to give the corresponding fractions, CWP(48.5 g), CWE(16.3 g), CWB(5.0 g), and CWW (20.0g), respectively. The petroleum fraction CWP was separated on a silica gel column (petroleum ether-ethyl acetate, 1:0 to 0:1) to afford six sub-fractions, CWP1-CWP6. CWP4(2.6 g) was separated on a silica gel column (petroleum ether-ethyl acetate-acetone, 10:1:0 to 2:1:0.5) to give compound **6** (97mg). CWP5 (7.0 g) was subjected to a silica gel column (petroleum ether-ethyl acetate, 100:1 to 10:1) to give compounds **1&2** (2.0 g) and **5** (90 mg). The EtOAc fraction CWE(16.3 g) was subjected to MCI with aqueous methanol (30%-100%) to afford six sub-fractions. CWE2 (1.3 g) and CWE3 (850 mg) were further chromatographed on silica gel columns (dichloromethane-acetone, 70:1 to 1:1) to give compound **4** (73 mg). CWE5 (870 mg) was further chromatographed on silica gel columns (dichloromethane - methanol, 100:1 to 3:1) to give compound **3** (50 mg).

By comparing their NMR data with those reported in the literature, structures of these compounds were identified as curcumenol (**1**) [1], procurcumenol (**3**) [2], zedoarondiol (**4**) [3], *7α,11α*-epoxy-*5β*-hydroxy-*9-guaiaen-8-one* (**5**) [4], curcumol (**6**) [5].

#### References:

- [1] Sukari MAH, Saad SM, Lajis NH, Rahmani M, Muse R, Yusuf UK, Riyanto S. Chemical constituents and bioactivity of *Curcuma aeruginosa* Roxb. Nat Prod Sci 2007;13:175–179.
- [3] Kuroyanagi M, Ueno A, UjiiieK, Sato S. Structures of sesquiterpenes from *Curcuma aromatica* Salisb. Chem Pharm Bull 1987;35:53–59.
- [2] Jang MK, Lee HJ, Kim JS, Ryu JH. A curcuminoid and two sesquiterpenoids from *Curcuma zedoaria* as inhibitors of nitric oxide synthesis in activated macrophages. Arch Pharm Res 2004;27:1220–1225.
- [4] Firman K, Kinoshita T, Itai A, Sankawa U. Terpenoids from *Curcuma heyneana*. Phytochemistry 1988;27:3887–3891.
- [5] Zhang H, Kang N, Qiu F, Qu GX, Yao XS. Four novel metabolites from microbial transformation of curcumol by *Cunninghamella blakesleana*. Chem Pharm Bull 2007;55:451-454.

(3) plots of DPPH free radical-scavenging assay results:

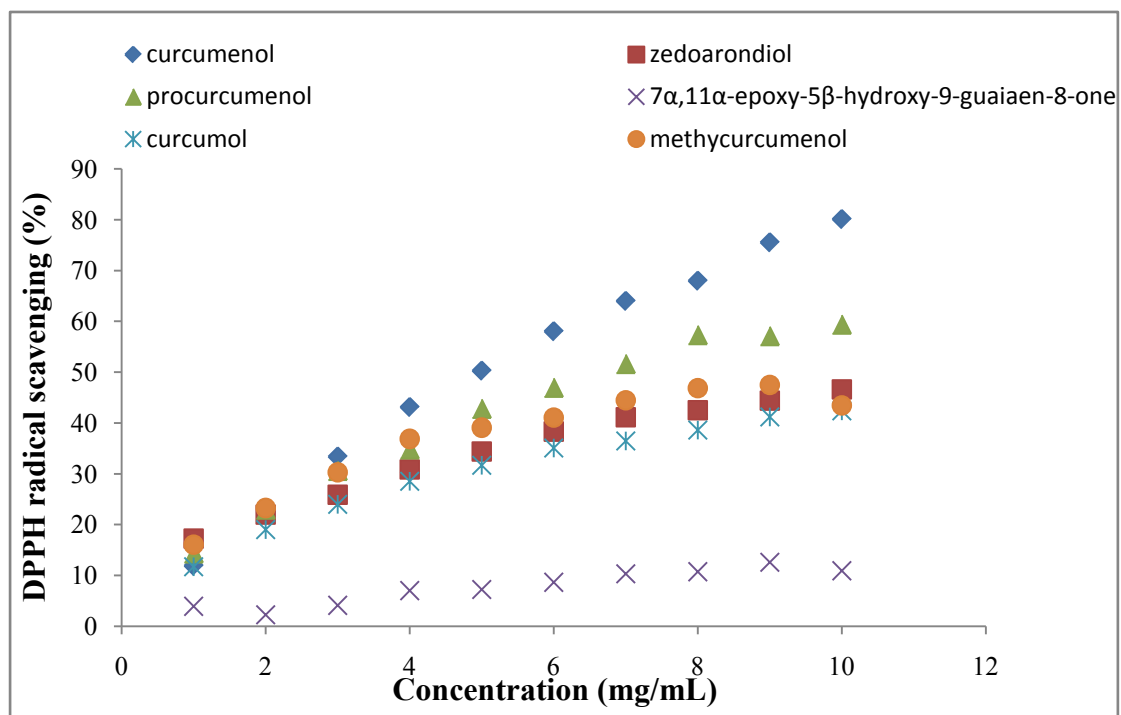

Figure. DPPH $\cdot$  assay of curcumenol derivatives.

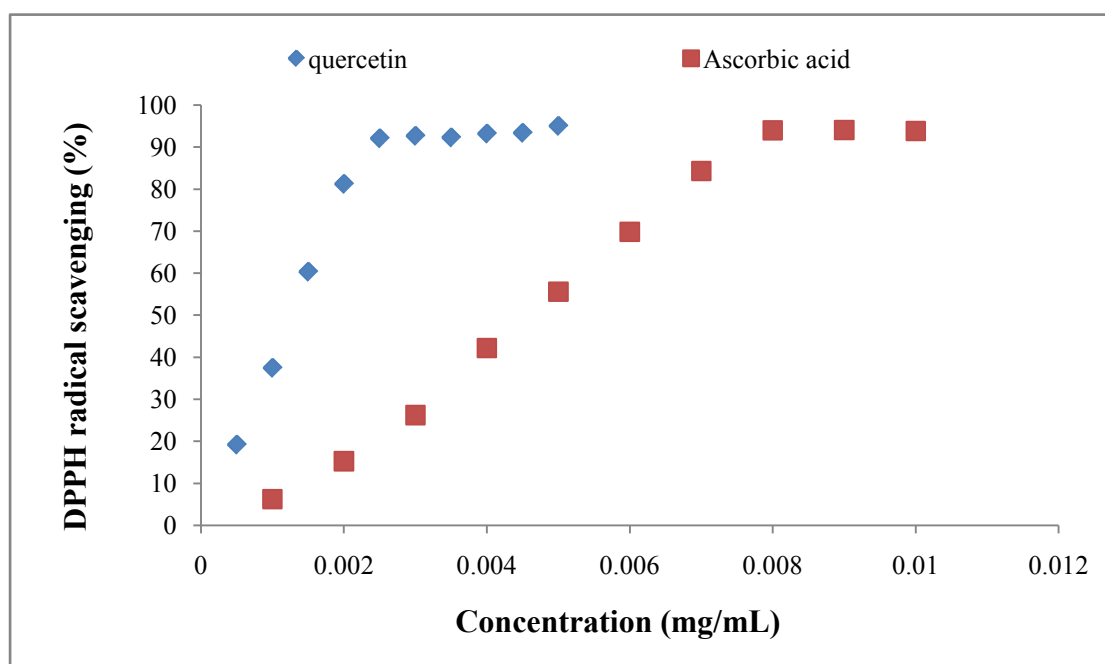

Figure. DPPH $\cdot$  assay of ascorbic acid and quercetin

## Section III. Quantum Chemical Calculations

### S43. Lowest energy conformers of curcumenol (1) and curcumenotone (2).

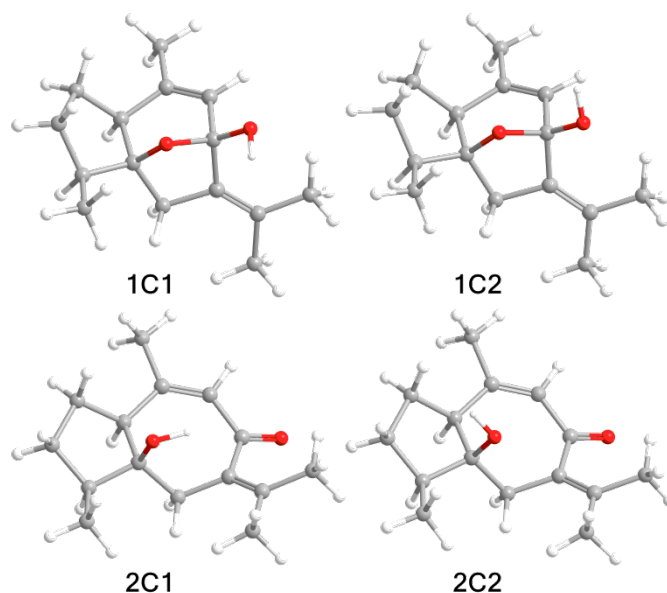

**Figure** B3LYP/6-311++G(2d,2p) optimized lowest energy conformers for **1** and **2**.

| conf.      | Gibbs free energy (298.15 K) |                       |                        |
|------------|------------------------------|-----------------------|------------------------|
|            | G (Hartree)                  | $\Delta G$ (Kcal/mol) | Boltzmann Distribution |
| <b>1</b>   |                              |                       |                        |
| <b>1C1</b> | -735.199013                  | 0                     | 0.777                  |
| <b>1C2</b> | -735.197836                  | 0.738579              | 0.223                  |
| <b>2</b>   |                              |                       |                        |
| <b>2C1</b> | -735.198785                  | 0                     | 0.997                  |
| <b>2C2</b> | -735.193417                  | 3.368474              | 0.003                  |

### S44. Calculation and calculated ECD data.

#### **Calculation:**

Firstly, conformational analysis for **1** and **2** were carried out via Monte Carlo searching using molecular mechanism with MMFF94 force field in the Spartan 08 program<sup>1</sup> and the results showed two conformers for each compound. These conformers were reoptimized using density functional theory (DFT) at the

B3LYP/6-311++G(2d,2p) level in vacuum using the Gaussian 09 program.<sup>2</sup> Harmonic vibrational frequencies were further calculated in the same level to confirm their stability. For UV and CD spectra, the energies, oscillator strengths, and rotational strengths of the first 60 electronic excitations were further calculated using the time-dependent density functional theory (TDDFT) methodology at the B3LYP/6-311++G(2d,2p) level in vacuum. The UV spectra were simulated in the GaussView 5.0 program, where the first 5 excited states and a 0.25 eV value for half-width at half height were adopted. The ECD spectra were simulated by the overlapping Gaussian function ( $\sigma = 0.25$  eV, half width at 1/e height),<sup>3</sup> in which velocity rotatory strengths of the first 3 excited states were adopted. To get the overall spectra, the simulated IR, UV, and ECD spectra of the lowest energy conformers for each compound were averaged according to the Boltzmann distribution theory and their relative Gibbs free energy ( $\Delta G$ ).

## References

- (1) *Spartan 08*; Wavefunction Inc.:Irvine, CA.
- (2) Frisch, M. J.; Trucks, G. W.; Schlegel, H. B.; Scuseria, G. E.; Robb, M. A.; Cheeseman, J. R.; Scalmani, G.; Barone, V.; Mennucci, B.; Petersson, G. A.; Nakatsuji, H.; Caricato, M.; Li, X.; Hratchian, H. P.; Izmaylov, A. F.; Bloino, J.; Zheng, G.; Sonnenberg, J. L.; Hada, M.; Ehara, M.; Toyota, K.; Fukuda, R.; Hasegawa, J.; Ishida, M.; Nakajima, T.; Honda, Y.; Kitao, O.; Nakai, H.; Vreven, T.; Montgomery, Jr., J. A.; Peralta, J. E.; Ogliaro, F.; Bearpark, M.; Heyd, J. J.; Brothers, E.; Kudin, K. N.; Staroverov, V. N.; Kobayashi, R.; Normand, J.; Raghavachari, K.; Rendell, A.; Burant, J. C.; Iyengar, S. S.; Tomasi, J.; Cossi, M.; Rega, N.; Millam, J. M.; Klene, M.; Knox, J. E.; Cross, J. B.; Bakken, V.; Adamo, C.; Jaramillo, J.; Gomperts, R.; Stratmann, R. E.; Yazyev, O.; Austin, A. J.; Cammi, R.; Pomelli, C.; Ochterski, J. W.; Martin, R. L.; Morokuma, K.; Zakrzewski, V. G.; Voth, G. A.; Salvador, P.; Dannenberg, J. J.; Dapprich, S.; Daniels, A. D.; Farkas, Ö.; Foresman, J. B.; Ortiz, J. V.; Cioslowski, J.; Fox, D. J. *Gaussian 09, Rev. C 01*, Gaussian, Inc., Wallingford CT, 2009.
- (3) Stephens, P. J.; Harada, N. *Chirality* **2010**, *22*, 229–233.

### ECD simulation:

ECD spectrum of each conformation is simulated according to the overlapping Gaussian functions expressed as:

$$\Delta\varepsilon(E) = \frac{1}{2.296 \times 10^{-39} \sqrt{\pi} \sigma} \sum_i^A \Delta E_i R_i e^{[-(E - \Delta E_i)^2 / \sigma^2]}$$

Where  $\sigma$  is half the bandwidth at 1/e peak height and expressed in energy units. The parameters  $\Delta E_i$  and  $R_i$  are the excitation energies and rotational strengths for the transition  $i$ , respectively.

The above function is converted to  $\Delta\varepsilon$ ,  $\lambda$  (wavelength) correlations as:

$$\Delta\varepsilon(\lambda) = \frac{1}{2.296 \times 10^{-39} \sqrt{\pi} \sigma} \sum_i^A \Delta E_i R_i e^{[-(1240/\lambda - \Delta E_i)^2 / \sigma^2]}$$

and then simulation were accomplished by using the Excel 2003 and the Origin 7.0 software.

To get the final spectra, all the simulated spectra of conformations of each compound were averaged according to their energy and the Boltzmann distribution theory expressed as:

$$\frac{N_i^*}{N} = \frac{g_i e^{-\varepsilon_i / k_B T}}{\sum g_i e^{-\varepsilon_i / k_B T}}$$

### ECD data for 1:

| State | C1                      |                     | C2                      |                     |
|-------|-------------------------|---------------------|-------------------------|---------------------|
|       | Excitation energies(eV) | Rotatory Strengths* | Excitation energies(eV) | Rotatory Strengths* |
| 1     | 5.051                   | 5.6898              | 5.0482                  | 8.9021              |
| 2     | 5.3197                  | 90.229              | 5.155                   | 102.0119            |
| 3     | 5.4656                  | 68.1309             | 5.4153                  | -2.469              |
| 4     | 5.5604                  | 3.9828              | 5.4652                  | -3.193              |
| 5     | 5.7496                  | 10.0507             | 5.5871                  | -3.2453             |
| 6     | 5.7817                  | 37.4116             | 5.7629                  | 13.2398             |
| 7     | 5.8223                  | -17.3158            | 5.8543                  | 43.9388             |
| 8     | 5.9167                  | 1.2387              | 5.8695                  | -0.6656             |
| 9     | 5.9744                  | -10.3359            | 5.9336                  | -0.1115             |

|    |        |          |        |          |
|----|--------|----------|--------|----------|
| 10 | 6.0239 | -18.5961 | 6.0193 | 18.1899  |
| 11 | 6.0436 | 1.8498   | 6.0952 | 39.4899  |
| 12 | 6.1022 | -5.9188  | 6.1431 | -17.1997 |
| 13 | 6.2152 | -3.063   | 6.1879 | -9.3908  |
| 14 | 6.2594 | 4.2261   | 6.2156 | 14.6567  |
| 15 | 6.3268 | 18.8813  | 6.2404 | -7.5613  |
| 16 | 6.3476 | -33.7058 | 6.295  | 0.4082   |
| 17 | 6.373  | 3.6967   | 6.3561 | -43.9713 |
| 18 | 6.4343 | -34.1045 | 6.438  | -37.6855 |
| 19 | 6.4696 | -23.699  | 6.5049 | -0.7104  |
| 20 | 6.5308 | 2.2335   | 6.5345 | -21.0967 |
| 21 | 6.5614 | 6.6041   | 6.5554 | 19.5781  |
| 22 | 6.6085 | -15.693  | 6.5957 | -4.0533  |
| 23 | 6.6233 | -8.313   | 6.6436 | -3.7142  |
| 24 | 6.6768 | 0.1487   | 6.6882 | -8.6122  |
| 25 | 6.7561 | 4.4094   | 6.7365 | -7.6368  |
| 26 | 6.7754 | -22.6984 | 6.7649 | 0.4032   |
| 27 | 6.8202 | 0.5504   | 6.8145 | -0.1659  |
| 28 | 6.827  | 22.7022  | 6.8404 | 2.8538   |
| 29 | 6.8471 | 2.1904   | 6.8575 | 2.0379   |
| 30 | 6.8939 | -10.1399 | 6.8663 | 0.0599   |
| 31 | 6.913  | -1.0367  | 6.9084 | -4.3279  |
| 32 | 6.949  | 0.4485   | 6.9717 | -16.1533 |
| 33 | 6.9821 | -12.7137 | 7.0052 | 11.2459  |
| 34 | 7.0123 | -9.6615  | 7.0373 | 2.0963   |
| 35 | 7.0347 | -7.447   | 7.0509 | 10.2756  |
| 36 | 7.0512 | 13.1565  | 7.0738 | -4.9029  |
| 37 | 7.0736 | 8.0736   | 7.1067 | 16.0631  |
| 38 | 7.1517 | 11.4053  | 7.1515 | 6.4499   |
| 39 | 7.1581 | -4.0482  | 7.1855 | -3.6946  |
| 40 | 7.1769 | -5.3805  | 7.2099 | 25.1538  |
| 41 | 7.2101 | 5.3093   | 7.2398 | 11.5612  |
| 42 | 7.2648 | 2.9963   | 7.3202 | -0.0344  |
| 43 | 7.3102 | 4.9437   | 7.3419 | -2.7116  |
| 44 | 7.3707 | -6.846   | 7.3466 | 19.482   |
| 45 | 7.3791 | 6.3213   | 7.3679 | 11.0826  |
| 46 | 7.4145 | 4.3359   | 7.3938 | -12.423  |
| 47 | 7.4445 | 6.6249   | 7.3984 | -4.343   |
| 48 | 7.4737 | -0.7176  | 7.453  | -19.1442 |
| 49 | 7.4803 | -9.0182  | 7.4855 | 0.2134   |
| 50 | 7.4986 | 19.2979  | 7.4913 | -1.6376  |
| 51 | 7.5401 | -14.4528 | 7.5095 | -4.9243  |
| 52 | 7.5728 | -3.3157  | 7.5207 | 0.9946   |

|    |        |         |        |         |
|----|--------|---------|--------|---------|
| 53 | 7.5807 | -1.4241 | 7.5631 | 0.4958  |
| 54 | 7.5888 | 3.2201  | 7.5752 | -1.9753 |
| 55 | 7.6081 | 0.5089  | 7.5844 | -0.6507 |
| 56 | 7.6141 | -4.8537 | 7.6041 | -3.2087 |
| 57 | 7.6302 | -4.1033 | 7.6291 | -7.6521 |
| 58 | 7.6536 | 5.3308  | 7.6412 | 3.4669  |
| 59 | 7.6547 | 16.6489 | 7.6682 | -1.5836 |
| 60 | 7.6744 | -3.9968 | 7.6771 | 8.5536  |

\* R(velocity)  $10^{*-40}$  erg-esu-cm

### ECD data for 2:

| State | C1                      |                     | C2                      |                     |
|-------|-------------------------|---------------------|-------------------------|---------------------|
|       | Excitation energies(eV) | Rotatory Strengths* | Excitation energies(eV) | Rotatory Strengths* |
| 1     | 3.5077                  | -16.9733            | 3.4672                  | -15.1602            |
| 2     | 4.3874                  | -21.5747            | 4.2501                  | -24.734             |
| 3     | 4.9797                  | 46.3887             | 5.1074                  | 44.183              |
| 4     | 5.1395                  | -22.6407            | 5.1568                  | 8.4763              |
| 5     | 5.4609                  | 24.3235             | 5.226                   | -26.9915            |
| 6     | 5.6588                  | -14.5208            | 5.4804                  | -24.2666            |
| 7     | 5.8727                  | 6.0052              | 5.6109                  | 0.9494              |
| 8     | 5.9612                  | -7.0194             | 5.6392                  | 0.4337              |
| 9     | 6.0341                  | -45.9877            | 5.7332                  | -1.632              |
| 10    | 6.0714                  | -4.4594             | 5.819                   | -1.8656             |
| 11    | 6.0962                  | 7.3134              | 5.8361                  | 5.5448              |
| 12    | 6.2168                  | 12.7268             | 6.0196                  | -1.306              |
| 13    | 6.2799                  | 5.7192              | 6.0797                  | 12.7816             |
| 14    | 6.3342                  | 13.1841             | 6.1112                  | 13.9799             |
| 15    | 6.3567                  | -3.953              | 6.1586                  | 10.0757             |
| 16    | 6.4033                  | 42.8681             | 6.1646                  | -0.0621             |
| 17    | 6.4144                  | 15.0445             | 6.2039                  | -19.2586            |
| 18    | 6.4316                  | 4.1255              | 6.228                   | 4.6731              |
| 19    | 6.4553                  | -3.1878             | 6.312                   | 8.6382              |
| 20    | 6.4845                  | -22.6687            | 6.3225                  | -7.2816             |
| 21    | 6.5447                  | 16.2224             | 6.3427                  | -21.4647            |
| 22    | 6.5532                  | -7.3837             | 6.433                   | 7.107               |
| 23    | 6.6376                  | 4.3871              | 6.5019                  | -1.9339             |



|    |        |          |        |          |
|----|--------|----------|--------|----------|
| 24 | 6.6509 | -1.2154  | 6.5135 | 8.9004   |
| 25 | 6.6706 | 3.6732   | 6.5394 | 2.2788   |
| 26 | 6.6874 | -12.8374 | 6.5505 | 11.0135  |
| 27 | 6.7088 | 12.2797  | 6.5766 | 4.3046   |
| 28 | 6.7694 | -2.9095  | 6.5999 | 2.8641   |
| 29 | 6.8072 | 18.0081  | 6.6136 | 17.5182  |
| 30 | 6.838  | -8.7074  | 6.6541 | -13.0623 |
| 31 | 6.8518 | 3.3432   | 6.656  | 16.3238  |
| 32 | 6.8697 | -1.2008  | 6.6915 | 26.7751  |
| 33 | 6.8809 | 12.4551  | 6.7766 | -0.1148  |
| 34 | 6.9153 | 9.2117   | 6.7957 | 0.9361   |
| 35 | 6.9299 | -5.648   | 6.8331 | -2.2316  |
| 36 | 6.9667 | -7.3147  | 6.8375 | 14.9219  |
| 37 | 7.0084 | 5.8536   | 6.8722 | -1.2647  |
| 38 | 7.0285 | 3.6917   | 6.8897 | 1.0033   |
| 39 | 7.0442 | -2.5445  | 6.9172 | -9.2812  |
| 40 | 7.0776 | -6.1726  | 6.938  | -0.5467  |
| 41 | 7.115  | -0.4706  | 7.0075 | -3.8601  |
| 42 | 7.1535 | 11.036   | 7.0211 | -4.0494  |
| 43 | 7.1711 | 5.7556   | 7.0372 | 4.8834   |
| 44 | 7.1775 | -3.5382  | 7.046  | 1.38     |
| 45 | 7.2001 | -13.2379 | 7.0631 | 1.5411   |
| 46 | 7.2149 | -7.2211  | 7.0957 | 2.3944   |
| 47 | 7.2428 | 9.2618   | 7.1238 | 2.2715   |
| 48 | 7.2877 | 6.4926   | 7.1445 | 2.3884   |
| 49 | 7.3269 | -11.0569 | 7.1664 | 5.106    |
| 50 | 7.3569 | 0.3823   | 7.1865 | 8.9107   |
| 51 | 7.3736 | 0.5011   | 7.2001 | 1.7476   |
| 52 | 7.3757 | 0.4489   | 7.2369 | 1.3227   |
| 53 | 7.4091 | 6.6902   | 7.2457 | -1.9175  |
| 54 | 7.4303 | 21.8028  | 7.2698 | 12.4493  |
| 55 | 7.4446 | -10.056  | 7.2897 | 1.7075   |
| 56 | 7.4645 | -6.6427  | 7.3189 | -8.8241  |
| 57 | 7.5073 | 4.5155   | 7.3548 | -10.0959 |
| 58 | 7.5322 | 0.716    | 7.4184 | -4.581   |
| 59 | 7.5409 | 4.0242   | 7.4231 | -1.5908  |
| 60 | 7.5617 | 0.6946   | 7.4383 | -4.1096  |

\* R(velocity) 10\*\*-40 erg-esu-cm

**S45. Energy profile of reaction path calculation.**

|                | Gibbs free energy (Hartree) | Kcal/mol     | rel. $\Delta E$ |
|----------------|-----------------------------|--------------|-----------------|
| MeOH           | -115.615466                 | /            | /               |
| <b>1</b>       | -734.449907                 | /            | /               |
| <b>1</b> +MeOH | -850.065373                 | -533424.5222 | 2.161772        |
| <b>1</b> -MeOH | -850.068818                 | -533426.684  | 0               |
| TS             | -850.025844                 | -533399.7174 | 26.96661        |
| <b>2</b> -MeOH | -850.062992                 | -533423.0281 | 3.655873        |
| <b>2</b> +MeOH | -850.060749                 | -533421.6206 | 1.407505        |
| <b>2</b>       | -734.445283                 | /            | /               |
